# Supplementary material
Source: PubMed Central journal article supplement (PMC7480389)
Supplement: AEM.00736-20-s0001.pdf [file AEM.00736-20-s0001.pdf]

## Supplementary information

### Genomic Characteristics of a Novel Species of Ammonia-oxidizing Archaea from the Jiulong River Estuary

Dayu Zou<sup>1,2,3</sup>, Ru Wan<sup>4</sup>, Lili Han<sup>4</sup>, Min Nina Xu<sup>4</sup>, Yang Liu<sup>2</sup>, Hongbin Liu<sup>3,5</sup>,  
Shuh-Ji Kao<sup>4\*</sup>, Meng Li<sup>1,2\*</sup>

<sup>1</sup>SZU-HKUST Joint PhD Program in Marine Environmental Science, Shenzhen University, Shenzhen, China

<sup>2</sup>Shenzhen Key Laboratory of Marine Microbiome Engineering, Institute for Advanced Study, Shenzhen University, Shenzhen, China

<sup>3</sup>Department of Ocean Science, The Hong Kong University of Science and Technology, Hong Kong SAR, China

<sup>4</sup>State Key Laboratory of Marine Environmental Science, Xiamen University, Xiamen, China

<sup>5</sup>Hong Kong Branch of Southern Marine Science & Engineering Guangdong Laboratory, The Hong Kong University of Science and Technology, Hong Kong SAR, China

**Running Head:** Novel AOA species from the Jiulong River Estuary

**Keywords:** Nitrification, ammonia-oxidizing archaeon, metagenome, Jiulong River Estuary

\*Corresponding author: Meng Li (limeng848@szu.edu.cn), Shuh-Ji Kao (sjkao@xmu.edu.cn).

**List of Tables:**

Table S1 Detailed qPCR results of samples.

Table S2 Primers and conditions used for qPCR.

Table S3 Summary of assembled scaffolds.

Table S4 CAZys identified in AOA MAGs in this study.

Table S5 Extracellular peptidases and enzymes identified in AOA MAGs in this study.

Table S6 Unique genes encoded in estuarine AOA MAGs compared with marine AOA.

Table S7 Unique genes encoded in the new AOA MAGs compared with other AOA genera.

Table S8 Detailed annotations of unique genes encoded in the new AOA MAGs

**List of Figures:**

Figure S1 Gel electrophoretograms for each primer pair used in the qPCR experiments.

Figure S2 Melt curves for each qPCR experiment.

Figure S3 Archaeal community composition.

Figure S4 The phylogenetic tree of 16S-23S rRNA genes.

Figure S5 Major metabolic pathway of new AOA genus.

Figure S6 The phylogenetic tree of chitinases.

Figure S7 COG comparisons between estuarine and marine AOA.

Figure S8 COG comparisons between the new AOA genus and other AOA genus.

Figure S9 The pan-genomic analysis of AOA MAGs in this study (in light blue) and other AOA isolates.

## Supplementary Tables

**Table S1 Sequences for each plasmid used in constructing the standard curve.**

| Target genes               | Sequences                                                                                                                                                                                                                                                                                                                                                                                                                                                                                                                                                                                                                                                                                             |
|----------------------------|-------------------------------------------------------------------------------------------------------------------------------------------------------------------------------------------------------------------------------------------------------------------------------------------------------------------------------------------------------------------------------------------------------------------------------------------------------------------------------------------------------------------------------------------------------------------------------------------------------------------------------------------------------------------------------------------------------|
| Bacterial and Archaeal 16S | TGTGCCAGCAGCCGCGGTAACACCGGCTCTTCTAGTGGTGGCCGTTTTTATTGGGC<br>TTAAAGCGTTCGTAGCCGATTTGTAAGTTCCTGGCGAAATTCTGTGCGCTAACGA<br>TAGAGCTTGCTGGGAATACTGCTTATCTTGAGACCGGGAGAGGCTAGAGGTA<br>CTAGGGTAGGGGTGAAATCCGTTAATCCTAGGGGGACCACCTGTGGTGAAGACGT<br>CTAGCTGGAACGGGTCTGACGGTGAGGGACGAAACCCAGGGGAGCAAACCGGAT<br>TAGATACCCGTGTAGTCCA                                                                                                                                                                                                                                                                                                                                                                               |
| Archaeal 16S               | TCCCGCCAATTCCTTTAAGTTTCAGCCTTGCGGCCGTACTCCCAGGCAGGCT<br>TAACGGCTTCCCTGCGGCACTAGAACGGCACGTAGCCGTCCAAACACCTAGCCTG<br>CATCGTTTACAGCTGGGACTACCCGGGTATCTAATCCGGTTCGCTCCCCAGCTTT<br>CATCCCTCACCGTCGGGCGCGTTCTAGCCGACAGCCTTCGCCACTGGTGGTCTTTC<br>CGGGATTATAGGATTTACCCCTACCCCGAAAATACCGTCGGCCTCTCCCGTCCC<br>TAGCCAAGCAGTATCCCCGCACACCAACGATTAAATCCGGTGGATTTAACAGGGG<br>ACTTGCCCAGCCAGCTACGGATGCTTTAGGCCCAATAAACATCCACACCCTCGG<br>AGAGCTGGTATTACCGCGGCGGCTGA                                                                                                                                                                                                                                                   |
| AOB <i>amoA</i>            | TGGGGTTTTACTGGTGGTCCATTATCCGATTAACCTTTGTTCTGCCCTCCACGAT<br>GATCCCCGGAGCGCTGATCATGGATACATGTCTGTTGTTAACCCGTAACCTGGATG<br>ATTACAGCACTGTTCCGGTGGCGGAGCATTGGACTATTGTTCTACCCGGGTAACCTG<br>GCCGATCTTCGGACCAACTCACCTTCCATTAGTAGTTGAAGGCGTATTGCTGTCAT<br>TGGCTGATTACACTGGATTCCTTTATGTTTCGTA<br>TACTGGTACACCTGAGTATGTTCCG<br>TTAATTGAACAAGGATCGCTACGTACCTTCGGTGGTACACTACGGTAATTGCTG<br>CATTCTTTGCGGCTTTTGTATCAATGTTAATGTTTCGTTGTCTGGTGGTACCTGGGA<br>AGTTCTATTGCACCTCGTTCTATTACGTCAAAGGTCCTAGAGGACGGATAACAG<br>AGAAGAATGATGTTACCGCTTTTGGCGAAGAAGGCTTTCCCGAGGGGA                                                                                                                                                  |
| AOA <i>amoA</i>            | TGCCATCCACCTGTATGTCCACGTAGTTAGTTTACATCCCAACGCCGTAACGTTA<br>CAGATAACACTGCTCCAGCTCCTGCGCCAAGCGCAACTGGGCTGTTATAGA<br>ACTTTCCTACCTGCGGTTCTATCGGTGTCATGTATGGAGGCAACGTAGGTCTTGGATACT<br>TGAATGCAGTCTCCAATGGATCTGCTACTGTAATCAGGTTTACCATGTTGAACAAT<br>GGTAACGACATTCCACACAGTACTCCGCCGAACAGTATCAGAGAGTGCTTGTCT<br>TCTTTGTGCGCCAATATGCCAAATCCAACAGCATTGCCGATGGAATCCACACTGG<br>TGTTACAATGAAGTCATATGGATATCCTAGTGCAAACCATGCACCTTTTGCTACCC<br>ATGTATACACCGTCATAATCAACGCGTAGTATGTTGCTGTTCCCTGGA<br>ACTCCTGTA<br>AATGTTAGGTAATATGTTGCACCTACACAAAGCATCAAAGTTTGTGAGATGGAAA<br>ATACTACAAAGGATGTCCAAGCCAATCTGTGTAGAAGATATAGTCACCTGCATT<br>AATTGTAAGCAGAGTAGAATTGACTGCTACCACTACTATGAATAAGTAATGAGTA<br>CATCGTCTAAGCCAGACCATA |

**Table S2 Detailed qPCR results of samples.**

|                                    | W1(copies/mL)  | W2(copies/mL)  | W3(copies/mL)  | S1(copies/g)   | S2(copies/g)   | S3(copies/g)   |
|------------------------------------|----------------|----------------|----------------|----------------|----------------|----------------|
| 16S rRNA<br>(Bacteria+<br>Archaea) | 7.25e5(2.78e4) | 7.91e5(2.64e4) | 7.86e5(7.61e4) | 4.46e9(2.66e8) | 4.80e9(3.35e7) | 1.05e9(9.99e7) |
| 16S rRNA<br>(Archaea)              | 1.41e5(2.38e4) | 2.32e5(2.15e4) | 3.09e5(3.66e4) | 1.40e9(2.55e8) | 2.14e9(2.04e8) | 3.72e8(1.87e7) |
| amoA<br>(Bacteria)                 | 1.38e3(3.68e1) | 1.24e3(1.10e2) | 3.46e2(1.70e1) | 2.27e7(2.25e6) | 6.80e6(7.34e5) | 4.62e5(4.53e4) |
| amoA<br>(Archaea)                  | 4.69e2(4.21e1) | 3.54e4(1.81e3) | 1.81e5(9.46e3) | 1.10e7(6.74e5) | 1.01e7(4.98e5) | 1.80e6(1.09e5) |

**Table S3 Summary of assembled scaffolds.**

|                               | W1      | W2      | W3      | S1      | S2      | S3      |
|-------------------------------|---------|---------|---------|---------|---------|---------|
| Raw reads (GB)                | 119.86  | 127.32  | 122.87  | 139.37  | 135.05  | 142.44  |
| Assembled<br>scaffolds (GB)   | 3.51    | 3.41    | 3.10    | 4.03    | 4.38    | 4.22    |
| No. of assembled<br>scaffolds | 3184430 | 3194728 | 2933303 | 2933303 | 4133450 | 3517306 |
| N50 (bp)                      | 1556    | 1485    | 1482    | 1384    | 1354    | 1658    |
| Longest scaffolds<br>(bp)     | 358766  | 871881  | 1248239 | 535704  | 330828  | 826502  |

**Table S4 CAZys identified in AOA MAGs in this study.**

| MAGs          | Scaffold No.        | Category   | Scaffold No.        | Category   |
|---------------|---------------------|------------|---------------------|------------|
|               | <b>contig_1_45</b>  | <b>GT2</b> | <b>contig_10_37</b> | <b>GT2</b> |
|               | <b>contig_186_4</b> | <b>GT2</b> | <b>contig_332_1</b> | <b>GT2</b> |
| <b>S1bin1</b> | <b>contig_12_3</b>  | <b>GT1</b> | <b>contig_219_3</b> | <b>GT1</b> |
|               | contig_18_26        | AA6        | contig_1_69         | GH18       |
|               | contig_2_75         | GH101      |                     |            |

|               |                          |            |                          |             |
|---------------|--------------------------|------------|--------------------------|-------------|
|               | <b>contig_106_4</b>      | <b>GT2</b> | <b>contig_17_12</b>      | <b>GT2</b>  |
|               | <b>contig_38_1</b>       | <b>GT2</b> | <b>contig_30_6</b>       | <b>GT2</b>  |
| <b>S2bin1</b> | <b>contig_78_3</b>       | <b>GT2</b> | <b>contig_85_6</b>       | <b>GT66</b> |
|               | <b>contig_1_7</b>        | <b>GT1</b> | contig_367_1             | GT1         |
|               | contig_18_3              | AA6        | contig_9_15              | GH18        |
|               | contig_15_5              | GH101      |                          |             |
|               | <b>contig_24_2</b>       | <b>GT2</b> | <b>contig_18_9</b>       | <b>GT2</b>  |
|               | <b>contig_7_21</b>       | <b>GT2</b> | <b>contig_115_4</b>      | <b>GT1</b>  |
| <b>S3bin1</b> | <b>contig_124_6</b>      | <b>GT1</b> | contig_189_4             | GT1         |
|               | contig_1_29              | AA6        | contig_259_2             | GH18        |
|               | contig_150_2             | GH101      |                          |             |
|               | <b>scaffold_8857_10</b>  | <b>GT2</b> | <b>scaffold_1213_32</b>  | <b>GT2</b>  |
|               | <b>scaffold_13204_12</b> | <b>GT2</b> | <b>scaffold_140512_4</b> | <b>GT2</b>  |
| <b>W1bin1</b> | <b>scaffold_84949_2</b>  | <b>GT2</b> | <b>scaffold_1213_15</b>  | <b>GT1</b>  |
|               | scaffold_7106_19         | AA6        | scaffold_3058_8          | GH18        |
|               | scaffold_8859_2          | GH101      |                          |             |
|               | <b>contig_177_3</b>      | <b>GT2</b> | <b>contig_437_3</b>      | <b>GT2</b>  |
|               | <b>contig_470_1</b>      | <b>GT2</b> | <b>contig_476_3</b>      | <b>GT66</b> |
| <b>W2bin3</b> | <b>contig_446_3</b>      | <b>GT1</b> | contig_117_7             | GH5         |
|               | contig_1984_2            | GH18       | contig_991_2             | GH101       |
|               | contig_813_2             | GH101      |                          |             |
| <b>W2bin1</b> | <b>contig_187_6</b>      | <b>GT2</b> | <b>contig_218_1</b>      | <b>GT2</b>  |

|               |                     |            |                     |            |
|---------------|---------------------|------------|---------------------|------------|
|               | <b>contig_434_4</b> | <b>GT1</b> | <b>contig_395_6</b> | <b>GT1</b> |
|               | contig_9_2          | GT1        | contig_232_7        | GH101      |
|               | contig_1_36         | GH101      |                     |            |
| <b>W2bin2</b> | contig_209_6        | GT1        | contig_46_9         | GT1        |
|               | contig_6_20         | GH101      | contig_373_1        | GH101      |
| <b>W3bin1</b> | <b>contig_37_12</b> | <b>GT2</b> | <b>contig_16_26</b> | <b>GT2</b> |
|               | <b>contig_194_2</b> | <b>GT2</b> | contig_1_44         | GH101      |
| <b>W3bin2</b> | <b>contig_21_29</b> | <b>GT2</b> | <b>contig_376_1</b> | <b>GT2</b> |
|               | <b>contig_163_5</b> | <b>GT2</b> | <b>contig_68_15</b> | <b>GT1</b> |
|               | contig_6_4          | GT1        | contig_115_7        | GT1        |
|               | contig_4_26         | GH101      |                     |            |

\* Scaffold No. with bold black indicates the results were verified by at least 2 out of 3 methods in the dbCAN (i.e, HMMER, DIAMOND and Hotpep).

**Table S5 Extracellular peptidases and enzymes identified in AOA MAGs in this study.**

| MAG           | Scaffold No.        | Annotation                                                                  |
|---------------|---------------------|-----------------------------------------------------------------------------|
| <b>S1bin1</b> | S1bin1_contig_40_10 | Gamma-glutamyltranspeptidase / glutathione hydrolase [EC:2.3.2.2 3.4.19.13] |
|               | S1bin1_contig_147_2 | Surface layer-associated subtilisin-like serine protease                    |
|               | S1bin1_contig_644_3 | Superoxide dismutase, Fe-Mn family [EC:1.15.1.1]                            |
|               | S1bin1_contig_440_3 | Ribonuclease P protein subunit POP4 [EC:3.1.26.5]                           |
| <b>S2bin1</b> | S2bin1_contig_81_1  | Gamma-glutamyltranspeptidase / glutathione hydrolase [EC:2.3.2.2 3.4.19.13] |

|               |                          |                                                                             |
|---------------|--------------------------|-----------------------------------------------------------------------------|
|               | S2bin1_contig_155_3      | Ribonuclease P protein subunit POP4 [EC:3.1.26.5]                           |
|               | S2bin1_contig_50_9       | Surface layer-associated subtilisin-like serine protease                    |
|               | S2bin1_contig_123_2      | Gamma-glutamyltranspeptidase / glutathione hydrolase [EC:2.3.2.2 3.4.19.13] |
|               | S2bin1_contig_64_6       | Belongs to the peptidase S8 family                                          |
|               | S2bin1_contig_64_7       | Superoxide dismutase, Fe-Mn family [EC:1.15.1.1]                            |
|               | S2bin1_contig_49_6       | Superoxide dismutase, Fe-Mn family [EC:1.15.1.1]                            |
|               | S2bin1_contig_51_6       | nirK; nitrite reductase (NO-forming) [EC:1.7.2.1]                           |
|               | <hr/>                    |                                                                             |
|               | S3bin1_contig_427_3      | Ribonuclease P protein subunit POP4 [EC:3.1.26.5]                           |
|               | S3bin1_contig_134_2      | Surface layer-associated subtilisin-like serine protease                    |
|               | S3bin1_contig_80_2       | Superoxide dismutase, Fe-Mn family [EC:1.15.1.1]                            |
| <b>S3bin1</b> | S3bin1_contig_109_3      | Belongs to the peptidase S8 family                                          |
|               | S3bin1_contig_109_4      | Superoxide dismutase, Fe-Mn family [EC:1.15.1.1]                            |
|               | S3bin1_contig_87_4       | nirK; nitrite reductase (NO-forming) [EC:1.7.2.1]                           |
|               | S3bin1_contig_154_7      | Thiol-disulfide isomerase or thioredoxin                                    |
|               | <hr/>                    |                                                                             |
|               | W1bin1_scaffold_3608_37  | Superoxide dismutase, Fe-Mn family [EC:1.15.1.1]                            |
|               | W1bin1_scaffold_17674_14 | Belongs to the peptidase S8 family                                          |
|               | W1bin1_scaffold_17674_15 | Superoxide dismutase, Fe-Mn family [EC:1.15.1.1]                            |
| <b>W1bin1</b> | W1bin1_scaffold_18718_9  | Ribonuclease P protein subunit POP4 [EC:3.1.26.5]                           |
|               | W1bin1_scaffold_28602_7  | Gamma-glutamyltranspeptidase / glutathione hydrolase [EC:2.3.2.2 3.4.19.13] |
|               | W1bin1_scaffold_45384_6  | nirK; nitrite reductase (NO-forming) [EC:1.7.2.1]                           |
|               | W1bin1_scaffold_50458_2  | Surface layer-associated subtilisin-like serine protease                    |
|               | <hr/>                    |                                                                             |
| <b>W2bin3</b> | W2bin3_contig_420_1      | Surface layer-associated subtilisin-like serine protease                    |



|               |                          |                                                                                |
|---------------|--------------------------|--------------------------------------------------------------------------------|
|               | W2bin3_contig_23<br>8_10 | Gamma-glutamyltranspeptidase / glutathione hydrolase<br>[EC:2.3.2.2 3.4.19.13] |
|               | W2bin3_contig_15<br>77_2 | Superoxide dismutase, Fe-Mn family [EC:1.15.1.1]                               |
|               | W2bin3_contig_73<br>5_3  | Superoxide dismutase, Fe-Mn family [EC:1.15.1.1]                               |
|               | W2bin3_contig_73<br>5_4  | Belongs to the peptidase S8 family                                             |
|               | W2bin3_contig_47<br>4_4  | Superoxide dismutase, Fe-Mn family [EC:1.15.1.1]                               |
|               | W2bin3_contig_49<br>2_2  | Serine protease, subtilisin family                                             |
|               | W2bin3_contig_69<br>2_2  | Serine protease, subtilisin family                                             |
| <b>W2bin1</b> | W2bin1_contig_83<br>_3   | Superoxide dismutase, Fe-Mn family [EC:1.15.1.1]                               |
|               | W2bin1_contig_83<br>_4   | Belongs to the peptidase S8 family                                             |
| <b>W2bin2</b> | W2bin2_contig_78<br>_1   | Formylglycine-generating sulfatase enzyme                                      |
|               | W2bin2_contig_53<br>1_1  | Surface layer-associated subtilisin-like serine protease                       |
|               | W2bin2_contig_10<br>99_1 | vgb; virginiamycin B lyase [EC:4.2.99.-]                                       |
| <b>W3bin1</b> | W3bin1_contig_13<br>64_2 | vgb; virginiamycin B lyase [EC:4.2.99.-]                                       |
|               | W3bin1_contig_5_<br>11   | Superoxide dismutase, Fe-Mn family [EC:1.15.1.1]                               |
|               | W3bin1_contig_28<br>8_5  | Superoxide dismutase, Fe-Mn family [EC:1.15.1.1]                               |
|               | W3bin1_contig_84<br>7_1  | DsbG-like Protein-disulfide isomerase                                          |
| <b>W3bin2</b> | W3bin2_contig_52<br>_15  | pepF, pepB; oligoendopeptidase F [EC:3.4.24.-], Peptidase family M3            |
|               | W3bin2_contig_22<br>_3   | Superoxide dismutase, Fe-Mn family [EC:1.15.1.1]                               |
|               | W3bin2_contig_22<br>_4   | Belongs to the peptidase S8 family                                             |

**Table S6 Unique gene categories encoded in estuarine AOA MAGs compared with marine AOA.**

| COG No.                                        | Category | Annotations                                                                          |
|------------------------------------------------|----------|--------------------------------------------------------------------------------------|
| <b>Unique gene categories in estuarine AOA</b> |          |                                                                                      |
| COG0033                                        | G        | Phosphoglucomutase                                                                   |
| COG0058                                        | G        | Glucan phosphorylase                                                                 |
| COG0068                                        | O        | Hydrogenase maturation factor HypF (carbamoyltransferase)                            |
| COG0198                                        | J        | Ribosomal protein L24                                                                |
| COG0208                                        | F        | Ribonucleotide reductase beta subunit, ferritin-like domain                          |
| COG0210                                        | L        | Superfamily I DNA or RNA helicase                                                    |
| COG0213                                        | F        | Thymidine phosphorylase                                                              |
| COG0216                                        | J        | Protein chain release factor A                                                       |
| COG0235                                        | G        | Ribulose-5-phosphate 4-epimerase/Fuculose-1-phosphate aldolase                       |
| COG0242                                        | J        | Peptide deformylase                                                                  |
| COG0255                                        | J        | Ribosomal protein L29                                                                |
| COG0276                                        | H        | Protoheme ferro-lyase (ferrochelataase)                                              |
| COG0290                                        | J        | Translation initiation factor IF-3                                                   |
| COG0291                                        | J        | Ribosomal protein L35                                                                |
| COG0292                                        | J        | Ribosomal protein L20                                                                |
| COG0297                                        | G        | Glycogen synthase                                                                    |
| COG0305                                        | L        | Replicative DNA helicase                                                             |
| COG0331                                        | I        | Malonyl CoA-acyl carrier protein transacylase                                        |
| COG0370                                        | P        | Fe <sup>2+</sup> transport system protein B                                          |
| COG0404                                        | E        | Glycine cleavage system T protein (aminomethyltransferase)                           |
| COG0408                                        | H        | Coproporphyrinogen III oxidase                                                       |
| COG0450                                        | V        | Alkyl hydroperoxide reductase subunit AhpC (peroxiredoxin)                           |
| COG0466                                        | O        | ATP-dependent Lon protease, bacterial type                                           |
| COG0477                                        | GEPR     | MFS family permease                                                                  |
| COG0515                                        | T        | Serine/threonine protein kinase                                                      |
| COG0523                                        | R        | GTPase, G3E family                                                                   |
| COG0551                                        | L        | ssDNA-binding Zn-finger and Zn-ribbon domains of topoisomerase 1                     |
| COG0557                                        | K        | Exoribonuclease R                                                                    |
| COG0566                                        | J        | tRNA G18 (ribose-2'-O)-methylase SpoU                                                |
| COG0568                                        | K        | DNA-directed RNA polymerase, sigma subunit (sigma70/sigma32)                         |
| COG0590                                        | J        | tRNA(Arg) A34 adenosine deaminase TadA                                               |
| COG0612                                        | R        | Predicted Zn-dependent peptidase                                                     |
| COG0617                                        | J        | tRNA nucleotidyltransferase/poly(A) polymerase                                       |
| COG0618                                        | F        | nanoRNase/pAp phosphatase, hydrolyzes c-di-AMP and oligoRNAs                         |
| COG0633                                        | C        | Ferredoxin                                                                           |
| COG0655                                        | C        | Multimeric flavodoxin WrbA                                                           |
| COG0664                                        | T        | cAMP-binding domain of CRP or a regulatory subunit of cAMP-dependent protein kinases |
| COG0669                                        | H        | Phosphopantetheine adenylyltransferase                                               |
| COG0711                                        | C        | FoF1-type ATP synthase, membrane subunit b or b'                                     |
| COG0721                                        | J        | Asp-tRNAAsn/Glu-tRNA Gln amidotransferase C subunit                                  |
| COG0727                                        | R        | Fe-S-cluster containing protein                                                      |

|         |    |                                                                                                                |
|---------|----|----------------------------------------------------------------------------------------------------------------|
| COG0742 | J  | 16S rRNA G966 N2-methylase RsmD                                                                                |
| COG0747 | E  | ABC-type transport system, periplasmic component                                                               |
| COG0749 | L  | DNA polymerase I - 3'-5' exonuclease and polymerase domains                                                    |
| COG0756 | FV | dUTPase                                                                                                        |
| COG0776 | L  | Bacterial nucleoid DNA-binding protein                                                                         |
| COG0777 | I  | Acetyl-CoA carboxylase beta subunit                                                                            |
| COG0789 | K  | DNA-binding transcriptional regulator, MerR family                                                             |
| COG0794 | GM | D-arabinose 5-phosphate isomerase GutQ                                                                         |
| COG0800 | G  | 2-keto-3-deoxy-6-phosphogluconate aldolase                                                                     |
| COG0834 | ET | ABC-type amino acid transport/signal transduction system, periplasmic component/domain                         |
| COG0859 | M  | ADP-heptose:LPS heptosyltransferase                                                                            |
| COG0861 | P  | Membrane protein TerC, possibly involved in tellurium resistance                                               |
| COG1002 | V  | Type II restriction/modification system, DNA methylase subunit YeeA                                            |
| COG1045 | E  | Serine acetyltransferase                                                                                       |
| COG1055 | P  | Na <sup>+</sup> /H <sup>+</sup> antiporter NhaD or related arsenite permease                                   |
| COG1090 | R  | NAD dependent epimerase/dehydratase family enzyme                                                              |
| COG1107 | L  | Archaea-specific RecJ-like exonuclease, contains DnaJ-type Zn finger domain                                    |
| COG1122 | PR | Energy-coupling factor transporter ATP-binding protein EcfA2                                                   |
| COG1123 | O  | ABC-type glutathione transport system ATPase component, contains duplicated ATPase domain                      |
| COG1145 | C  | Ferredoxin                                                                                                     |
| COG1194 | L  | Adenine-specific DNA glycosylase, acts on AG and A-oxoG pairs                                                  |
| COG1222 | O  | ATP-dependent 26S proteasome regulatory subunit                                                                |
| COG1228 | Q  | Imidazolonepropionase or related amidohydrolase                                                                |
| COG1232 | H  | Protoporphyrinogen oxidase                                                                                     |
| COG1246 | E  | N-acetylglutamate synthase or related acetyltransferase, GNAT family                                           |
| COG1249 | C  | Pyruvate/2-oxoglutarate dehydrogenase complex, dihydrolipoamide dehydrogenase (E3) component or related enzyme |
| COG1283 | P  | Na <sup>+</sup> /phosphate symporter                                                                           |
| COG1341 | J  | Polynucleotide 5'-kinase, involved in rRNA processing                                                          |
| COG1376 | M  | Lipoprotein-anchoring transpeptidase ErfK/SrfK                                                                 |
| COG1401 | V  | 5-methylcytosine-specific restriction endonuclease McrBC, GTP-binding regulatory subunit McrB                  |
| COG1406 | N  | Chemotaxis protein CheX, a CheY~P-specific phosphatase                                                         |
| COG1463 | M  | ABC-type transporter Mla maintaining outer membrane lipid asymmetry, periplasmic component MlaD                |
| COG1468 | V  | CRISPR/Cas system-associated exonuclease Cas4, RecB family                                                     |
| COG1489 | GT | DNA-binding protein, stimulates sugar fermentation                                                             |
| COG1502 | I  | Phosphatidylserine/phosphatidylglycerophosphate/cardiolipin synthase or related enzyme                         |
| COG1512 | S  | Uncharacterized membrane protein YgcG, contains a TPM-fold domain                                              |
| COG1519 | M  | 3-deoxy-D-manno-octulosonic-acid transferase                                                                   |
| COG1520 | M  | Outer membrane protein assembly factor BamB, contains PQQ-like beta-propeller                                  |

|         |    |                                                                                                    |
|---------|----|----------------------------------------------------------------------------------------------------|
|         |    | repeat                                                                                             |
| COG1547 | S  | Predicted metal-dependent hydrolase                                                                |
| COG1549 | R  | Predicted RNA-binding protein, contains uracil-DNA-glycosylase-like and PUA domains                |
| COG1552 | J  | Ribosomal protein L40E                                                                             |
| COG1560 | I  | Lauroyl/myristoyl acyltransferase                                                                  |
| COG1566 | V  | Multidrug resistance efflux pump                                                                   |
| COG1591 | L  | Holliday junction resolvase, archaeal type                                                         |
| COG1617 | J  | tRNA threonylcarbamoyladenosine modification (KEOPS) complex, Cgi121 subunit                       |
| COG1704 | S  | Uncharacterized conserved protein                                                                  |
| COG1778 | MR | 3-deoxy-D-manno-octulosonate 8-phosphate phosphatase KdsC and related HAD superfamily phosphatases |
| COG1783 | X  | Phage terminase large subunit                                                                      |
| COG1812 | H  | Archaeal S-adenosylmethionine synthetase                                                           |
| COG1843 | N  | Flagellar hook assembly protein FlgD                                                               |
| COG1845 | C  | Heme/copper-type cytochrome/quinol oxidase, subunit 3                                              |
| COG1871 | NT | Chemotaxis receptor (MCP) glutamine deamidase CheD                                                 |
| COG1879 | G  | ABC-type sugar transport system, periplasmic component, contains N-terminal xre family HTH domain  |
| COG1893 | H  | Ketopantoate reductase                                                                             |
| COG1913 | R  | Predicted Zn-dependent protease                                                                    |
| COG1924 | I  | Activator of 2-hydroxyglutaryl-CoA dehydratase (HSP70-class ATPase domain)                         |
| COG1970 | M  | Large-conductance mechanosensitive channel                                                         |
| COG1981 | S  | Uncharacterized membrane protein                                                                   |
| COG2009 | C  | Succinate dehydrogenase/fumarate reductase, cytochrome b subunit                                   |
| COG2015 | Q  | Alkyl sulfatase BDS1 and related hydrolases, metallo-beta-lactamase superfamily                    |
| COG2057 | I  | Acyl CoA:acetate/3-ketoacid CoA transferase, beta subunit                                          |
| COG2061 | R  | Uncharacterized conserved protein, contains ACT domain                                             |
| COG2072 | P  | Predicted flavoprotein CzcO associated with the cation diffusion facilitator CzcD                  |
| COG2105 | R  | Uncharacterized conserved protein YtfP, gamma-glutamylcyclotransferase (GGCT)/AIG2-like family     |
| COG2126 | J  | Ribosomal protein L37E                                                                             |
| COG2142 | C  | Succinate dehydrogenase, hydrophobic anchor subunit                                                |
| COG2153 | R  | Predicted N-acyltransferase, GNAT family                                                           |
| COG2175 | Q  | Taurine dioxygenase, alpha-ketoglutarate-dependent                                                 |
| COG2177 | D  | Cell division protein FtsX                                                                         |
| COG2217 | P  | Cation transport ATPase                                                                            |
| COG2230 | I  | Cyclopropane fatty-acyl-phospholipid synthase and related methyltransferases                       |
| COG2251 | R  | Predicted nuclease, RecB family                                                                    |
| COG2263 | R  | Predicted RNA methylase                                                                            |
| COG2267 | I  | Lysophospholipase, alpha-beta hydrolase superfamily                                                |
| COG2268 | S  | Uncharacterized membrane protein YqiK, contains Band7/PHB/SPFH domain                              |
| COG2271 | G  | Sugar phosphate permease                                                                           |

|         |    |                                                                                                             |
|---------|----|-------------------------------------------------------------------------------------------------------------|
| COG2274 | V  | ABC-type bacteriocin/lantibiotic exporters, contain an N-terminal double-glycine peptidase domain           |
| COG2319 | R  | WD40 repeat                                                                                                 |
| COG2332 | CO | Cytochrome c-type biogenesis protein CcmE                                                                   |
| COG2333 | R  | Metal-dependent hydrolase, beta-lactamase superfamily II                                                    |
| COG2339 | T  | Membrane proteinase PrsW, cleaves anti-sigma factor RsiW, M82 family                                        |
| COG2345 | K  | Predicted transcriptional regulator, ArsR family                                                            |
| COG2433 | R  | Possible nuclease of RNase H fold, RuvC/YqgF family                                                         |
| COG2469 | S  | Uncharacterized protein, contains HTH domain                                                                |
| COG2510 | S  | Uncharacterized membrane protein                                                                            |
| COG2604 | S  | Uncharacterized conserved protein                                                                           |
| COG2609 | C  | Pyruvate dehydrogenase complex, dehydrogenase (E1) component                                                |
| COG2761 | O  | Predicted dithiol-disulfide isomerase, DsbA family                                                          |
| COG2811 | C  | Archaeal/vacuolar-type H <sup>+</sup> -ATPase subunit H                                                     |
| COG2815 | M  | PASTA domain, binds beta-lactams                                                                            |
| COG2816 | F  | NADH pyrophosphatase NudC, Nudix superfamily                                                                |
| COG2870 | M  | ADP-heptose synthase, bifunctional sugar kinase/adenylyltransferase                                         |
| COG2884 | D  | ABC-type ATPase involved in cell division                                                                   |
| COG2885 | M  | Outer membrane protein OmpA and related peptidoglycan-associated (lipo)proteins                             |
| COG2951 | M  | Membrane-bound lytic murein transglycosylase B                                                              |
| COG2961 | J  | 23S rRNA A2030 N6-methylase RlmJ                                                                            |
| COG3072 | F  | Adenylate cyclase                                                                                           |
| COG3087 | D  | Cell division protein FtsN                                                                                  |
| COG3096 | D  | Chromosome condensin MukBEF, ATPase and DNA-binding subunit MukB [Escherichia coli str. K-12 substr. MG1655 |
| COG3108 | S  | Uncharacterized conserved protein YcbK, DUF882 family                                                       |
| COG3153 | R  | Predicted N-acetyltransferase YhbS                                                                          |
| COG3177 | K  | Fic family protein                                                                                          |
| COG3212 | S  | Uncharacterized membrane protein YkoI                                                                       |
| COG3291 | S  | PKD repeat                                                                                                  |
| COG3316 | X  | Transposase (or an inactivated derivative)                                                                  |
| COG3325 | G  | Chitinase, GH18 family                                                                                      |
| COG3333 | R  | TctA family transporter                                                                                     |
| COG3352 | N  | Archaeum component FlaC                                                                                     |
| COG3355 | K  | Predicted transcriptional regulator                                                                         |
| COG3378 | X  | Phage- or plasmid-associated DNA primase                                                                    |
| COG3409 | M  | Peptidoglycan-binding (PGRP) domain of peptidoglycan hydrolases                                             |
| COG3480 | T  | Predicted secreted protein containing a PDZ domain                                                          |
| COG3497 | X  | Phage tail sheath protein FI                                                                                |
| COG3562 | M  | Capsule polysaccharide modification protein KpsS                                                            |
| COG3565 | R  | Predicted dioxygenase of extradiol dioxygenase family                                                       |
| COG3577 | R  | Predicted aspartyl protease                                                                                 |
| COG3623 | G  | L-ribulose-5-phosphate 3-epimerase UlaE                                                                     |

|         |    |                                                                                        |
|---------|----|----------------------------------------------------------------------------------------|
| COG3628 | X  | Phage baseplate assembly protein W                                                     |
| COG3677 | X  | Transposase                                                                            |
| COG3721 | P  | Putative heme iron utilization protein                                                 |
| COG3752 | R  | Steroid 5-alpha reductase family enzyme                                                |
| COG3772 | M  | Phage-related lysozyme (muramidase), GH24 family                                       |
| COG3773 | DM | Cell wall hydrolase CwlJ, involved in spore germination                                |
| COG3829 | KT | Transcriptional regulator containing PAS, AAA-type ATPase, and DNA-binding Fis domains |
| COG3832 | S  | Uncharacterized conserved protein YndB, AHSA1/START domain                             |
| COG3881 | S  | Uncharacterized protein YrrD, contains PRC-barrel domain                               |
| COG4049 | R  | Uncharacterized protein, contains archaeal-type C2H2 Zn-finger                         |
| COG4175 | E  | ABC-type proline/glycine betaine transport system, ATPase component                    |
| COG4245 | S  | Uncharacterized conserved protein YegL, contains vWA domain of TerY type               |
| COG4249 | R  | Uncharacterized protein, contains caspase domain                                       |
| COG4276 | R  | Ligand-binding SRPBCC domain                                                           |
| COG4293 | S  | Uncharacterized protein                                                                |
| COG4294 | L  | UV DNA damage repair endonuclease                                                      |
| COG4346 | O  | Predicted membrane-bound dolichyl-phosphate-mannose-protein mannosyltransferase        |
| COG4372 | S  | Uncharacterized conserved protein, contains DUF3084 domain                             |
| COG4373 | X  | Mu-like prophage FluMu protein gp28                                                    |
| COG4430 | S  | Uncharacterized conserved protein YdeI, YjbR/CyaY-like superfamily, DUF1801 family     |
| COG4487 | S  | Uncharacterized protein                                                                |
| COG4531 | P  | ABC-type Zn <sup>2+</sup> transport system, periplasmic component/surface adhesin      |
| COG4558 | P  | ABC-type heme transport system, periplasmic component                                  |
| COG4627 | R  | Predicted SAM-dependent methyltransferase                                              |
| COG4641 | D  | Spore maturation protein CgeB                                                          |
| COG4875 | S  | Uncharacterized protein                                                                |
| COG4942 | D  | Septal ring factor EnvC, activator of murein hydrolases AmiA and AmiB                  |
| COG4982 | I  | 3-oxoacyl-ACP reductase domain of yeast-type FAS1                                      |
| COG4990 | S  | Uncharacterized protein YvpB                                                           |
| COG5002 | T  | Signal transduction histidine kinase                                                   |
| COG5023 | S  | Uncharacterized protein                                                                |
| COG5148 | S  | Uncharacterized protein                                                                |
| COG5276 | S  | Uncharacterized conserved protein                                                      |
| COG5425 | S  | Usg protein (tryptophan operon, function unknown)                                      |
| COG5566 | K  | Transcriptional regulator, Middle operon regulator (Mor) family                        |
| COG5632 | M  | N-acetylmuramoyl-L-alanine amidase CwlA                                                |
| COG5635 | T  | Predicted NTPase, NACHT family domain                                                  |
| COG5637 | S  | Uncharacterized membrane protein                                                       |
| COG5653 | N  | Acetyltransferase involved in cellulose biosynthesis, CelD/BcsL family                 |
| COG5663 | S  | Uncharacterized protein, HAD superfamily                                               |

---

**Unique gene categories in marine AOA**

---

|         |    |                                                                                                          |
|---------|----|----------------------------------------------------------------------------------------------------------|
| COG0022 | C  | Pyruvate/2-oxoglutarate/acetoin dehydrogenase complex, dehydrogenase (E1) component                      |
| COG0160 | E  | 4-aminobutyrate aminotransferase or related aminotransferase                                             |
| COG0236 | IQ | Acyl carrier protein                                                                                     |
| COG0295 | F  | Cytidine deaminase                                                                                       |
| COG0426 | C  | Flavorubredoxin                                                                                          |
| COG0471 | G  | Di- and tricarboxylate transporter                                                                       |
| COG0582 | LX | Integrase                                                                                                |
| COG0637 | GR | Beta-phosphoglucomutase or related phosphatase, HAD superfamily                                          |
| COG0654 | HC | 2-polyprenyl-6-methoxyphenol hydroxylase and related FAD-dependent oxidoreductases                       |
| COG0675 | X  | Transposase                                                                                              |
| COG0733 | R  | Na <sup>+</sup> -dependent transporter, SNF family                                                       |
| COG0737 | FV | 2',3'-cyclic-nucleotide 2'-phosphodiesterase/5'- or 3'-nucleotidase, 5'-nucleotidase family              |
| COG0847 | L  | DNA polymerase III, epsilon subunit or related 3'-5' exonuclease                                         |
| COG1004 | M  | UDP-glucose 6-dehydrogenase                                                                              |
| COG1044 | M  | UDP-3-O-[3-hydroxymyristoyl] glucosamine N-acyltransferase                                               |
| COG1071 | C  | TPP-dependent pyruvate or acetoin dehydrogenase subunit alpha                                            |
| COG1080 | G  | Phosphoenolpyruvate-protein kinase (PTS system EI component in bacteria)                                 |
| COG1083 | M  | CMP-N-acetylneuraminic acid synthetase                                                                   |
| COG1099 | R  | Predicted metal-dependent hydrolase, TIM-barrel fold                                                     |
| COG1134 | GM | ABC-type polysaccharide/polyol phosphate transport system, ATPase component                              |
| COG1179 | J  | tRNA A37 threonylcarbamoyladenosine dehydratase                                                          |
| COG1210 | M  | UTP-glucose-1-phosphate uridylyltransferase                                                              |
| COG1309 | K  | DNA-binding transcriptional regulator, AcrR family                                                       |
| COG1335 | HR | Nicotinamidase-related amidase                                                                           |
| COG1359 | C  | Quinol monooxygenase YgiN                                                                                |
| COG1403 | V  | 5-methylcytosine-specific restriction endonuclease McrA                                                  |
| COG1427 | R  | Predicted periplasmic solute-binding protein                                                             |
| COG1432 | S  | Uncharacterized conserved protein, LabA/DUF88 family                                                     |
| COG1497 | K  | Predicted transcriptional regulator                                                                      |
| COG1518 | V  | CRISPR/Cas system-associated endonuclease CasI                                                           |
| COG1524 | R  | Predicted pyrophosphatase or phosphodiesterase, AlkP superfamily                                         |
| COG1680 | V  | CubicO group peptidase, beta-lactamase class C family                                                    |
| COG1682 | GM | ABC-type polysaccharide/polyol phosphate export permease                                                 |
| COG1715 | V  | Restriction endonuclease Mrr                                                                             |
| COG1737 | K  | DNA-binding transcriptional regulator, MurR/RpiR family, contains HTH and SIS domains                    |
| COG1776 | T  | Chemotaxis protein CheY-P-specific phosphatase CheC                                                      |
| COG1777 | K  | Predicted transcriptional regulator                                                                      |
| COG2071 | E  | Gamma-glutamyl-gamma-aminobutyrate hydrolase PuuD (putrescine degradation), contains GATase1-like domain |
| COG2120 | G  | N-acetylglucosaminyl deacetylase, LmbE family                                                            |

|         |    |                                                                                               |
|---------|----|-----------------------------------------------------------------------------------------------|
| COG2249 | R  | Putative NADPH-quinone reductase (modulator of drug activity B)                               |
| COG2303 | IR | Choline dehydrogenase or related flavoprotein                                                 |
| COG2357 | FT | ppGpp synthetase catalytic domain (RelA/SpoT-type nucleotidyltransferase)                     |
| COG2706 | G  | 6-phosphogluconolactonase, cycloisomerase 2 family                                            |
| COG2717 | C  | Periplasmic DMSO/TMAO reductase YedYZ, heme-binding membrane subunit                          |
| COG2865 | K  | Predicted transcriptional regulator, contains HTH domain                                      |
| COG2932 | X  | Phage repressor protein C, contains Cro/C1-type HTH and peptisase s24 domains                 |
| COG2957 | E  | Agmatine/peptidylarginine deiminase                                                           |
| COG3055 | M  | N-acetylneuraminic acid mutarotase                                                            |
| COG3083 | M  | Membrane-anchored periplasmic protein YejM, alkaline phosphatase superfamily                  |
| COG3239 | I  | Fatty acid desaturase                                                                         |
| COG3401 | R  | Fibronectin type 3 domain                                                                     |
| COG3430 | N  | Archaeal flagellin (archaellin), FlaG/FlaF family                                             |
| COG3465 | S  | Uncharacterized protein YwgA                                                                  |
| COG3584 | S  | 3D (Asp-Asp-Asp) domain                                                                       |
| COG3609 | K  | Transcriptional regulator, contains Arc/MetJ-type RHH (ribbon-helix-helix) DNA-binding domain |
| COG3883 | S  | Uncharacterized N-terminal domain of peptidoglycan hydrolase CwIO                             |
| COG3980 | M  | Spore coat polysaccharide biosynthesis protein SpsG, predicted glycosyltransferase            |
| COG4254 | R  | Uncharacterized conserved protein, contains LysM and FecR domains                             |
| COG4274 | S  | Uncharacterized protein, contains GYD domain                                                  |
| COG4343 | V  | CRISPR/Cas system-associated exonuclease Cas4, RecB family                                    |
| COG4422 | X  | Bacteriophage protein gp37                                                                    |
| COG4447 | R  | Uncharacterized protein related to plant photosystem II stability/assembly factor             |
| COG4477 | D  | Septation ring formation regulator EzrA                                                       |
| COG4565 | KT | Response regulator of citrate/malate metabolism                                               |
| COG4675 | S  | Microcystin-dependent protein (function unknown)                                              |
| COG4973 | L  | Site-specific recombinase XerC                                                                |
| COG5099 | S  | Uncharacterized protein                                                                       |
| COG5278 | T  | Extracellular (periplasmic) sensor domain CHASE3 (specificity unknown)                        |
| COG5285 | Q  | Ectoine hydroxylase-related dioxygenase, phytanoyl-CoA dioxygenase (PhyH) family              |
| COG5301 | X  | Phage-related tail fibre protein                                                              |
| COG5422 | S  | Uncharacterized protein                                                                       |

**Table S7 Unique gene categories encoded in MAGs of the new AOA species in this study compared with other AOA genus or species.**

| COG No.                                             | Category | Annotations           |
|-----------------------------------------------------|----------|-----------------------|
| <b>Jiulong River estuary AOA vs. Nitrosopumilus</b> |          |                       |
| COG0199                                             | J        | Ribosomal protein S14 |



---

|         |    |                                                                                     |
|---------|----|-------------------------------------------------------------------------------------|
| COG0306 | P  | Phosphate/sulfate permease                                                          |
| COG0500 | QR | SAM-dependent methyltransferase                                                     |
| COG0515 | T  | Serine/threonine protein kinase                                                     |
| COG0655 | C  | Multimeric flavodoxin WrbA                                                          |
| COG0735 | P  | Fe <sup>2+</sup> or Zn <sup>2+</sup> uptake regulation protein                      |
| COG1180 | O  | Pyruvate-formate lyase-activating enzyme                                            |
| COG1232 | H  | Protoporphyrinogen oxidase                                                          |
| COG1355 | R  | Predicted class III extradiol dioxygenase, MEMO1 family                             |
| COG1475 | D  | Chromosome segregation protein Spo0J, contains ParB-like nuclease domain            |
| COG1549 | R  | Predicted RNA-binding protein, contains uracil-DNA-glycosylase-like and PUA domains |
| COG1683 | S  | Uncharacterized conserved protein YbbK, DUF523 family                               |
| COG1721 | S  | Uncharacterized conserved protein, DUF58 family, contains vWF domain                |
| COG1846 | K  | DNA-binding transcriptional regulator, MarR family                                  |
| COG1889 | J  | Fibrillar-like rRNA methylase                                                       |
| COG1913 | R  | Predicted Zn-dependent protease                                                     |
| COG2078 | S  | Uncharacterized conserved protein, AMMECR1 domain                                   |
| COG2443 | U  | Preprotein translocase subunit Sss1                                                 |
| COG2770 | T  | HAMP domain                                                                         |
| COG2811 | C  | Archaeal/vacuolar-type H <sup>+</sup> -ATPase subunit H                             |
| COG2815 | M  | PASTA domain, binds beta-lactams                                                    |
| COG3119 | P  | Arylsulfatase A or related enzyme                                                   |
| COG3153 | R  | Predicted N-acetyltransferase YhbS                                                  |
| COG3325 | G  | Chitinase, GH18 family                                                              |
| COG3881 | S  | Uncharacterized protein YrrD, contains PRC-barrel domain                            |
| COG4294 | L  | UV DNA damage repair endonuclease                                                   |
| COG4372 | S  | Uncharacterized conserved protein, contains DUF3084 domain                          |
| COG4639 | R  | Predicted kinase                                                                    |
| COG5002 | T  | Signal transduction histidine kinase                                                |
| COG5653 | N  | Acetyltransferase involved in cellulose biosynthesis, CelD/BcsL family              |

---

**Jiulong River estuary AOA vs. *Ca. Nitrosoarchaeum***

---

|         |   |                                                                                     |
|---------|---|-------------------------------------------------------------------------------------|
| COG0312 | T | Serine/threonine protein kinase                                                     |
| COG0405 | D | Chromosome segregation protein Spo0J, contains ParB-like nuclease domain            |
| COG0421 | R | Predicted RNA-binding protein, contains uracil-DNA-glycosylase-like and PUA domains |
| COG0515 | S | Uncharacterized conserved protein YbbK, DUF523 family                               |
| COG0636 | S | Uncharacterized conserved protein, DUF58 family, contains vWF domain                |
| COG0640 | R | Predicted Zn-dependent protease                                                     |
| COG1011 | C | Archaeal/vacuolar-type H <sup>+</sup> -ATPase subunit H                             |
| COG1181 | M | PASTA domain, binds beta-lactams                                                    |
| COG1301 | R | Predicted N-acetyltransferase YhbS                                                  |
| COG1475 | G | Chitinase, GH18 family                                                              |
| COG1549 | S | Uncharacterized protein YrrD, contains PRC-barrel domain                            |
| COG1605 | L | UV DNA damage repair endonuclease                                                   |

---

|         |    |                                                                                                     |
|---------|----|-----------------------------------------------------------------------------------------------------|
| COG1683 | S  | Uncharacterized conserved protein, contains DUF3084 domain                                          |
| COG1721 | T  | Signal transduction histidine kinase                                                                |
| COG1828 | N  | Acetyltransferase involved in cellulose biosynthesis, CelD/BcsL family                              |
| COG1913 | R  | Predicted Zn-dependent protease or its inactivated homolog                                          |
| COG2015 | E  | Gamma-glutamyltranspeptidase                                                                        |
| COG2222 | E  | Spermidine synthase                                                                                 |
| COG2260 | C  | FoF1-type ATP synthase, membrane subunit c/Archaeal/vacuolar-type H <sup>+</sup> -ATPase, subunit K |
| COG2329 | K  | DNA-binding transcriptional regulator, ArsR family                                                  |
| COG2430 | H  | FMN phosphatase YigB, HAD superfamily                                                               |
| COG2811 | MR | D-alanine-D-alanine ligase and related ATP-grasp enzymes                                            |
| COG2815 | C  | Na <sup>+</sup> /H <sup>+</sup> -dicarboxylate symporter                                            |
| COG3153 | E  | Chorismate mutase                                                                                   |
| COG3221 | F  | Phosphoribosylformylglycinamide (FGAM) synthase, PurS component                                     |
| COG3325 | Q  | Alkyl sulfatase BDS1 and related hydrolases, metallo-beta-lactamase superfamily                     |
| COG3576 | M  | Fructoselysine-6-P-deglycase FrlB and related proteins with duplicated sugar isomerase (SIS) domain |
| COG3614 | J  | rRNA maturation protein Nop10, contains Zn-ribbon domain                                            |
| COG3638 | H  | Heme-degrading monooxygenase HmoA and related ABM domain proteins                                   |
| COG3639 | S  | Uncharacterized protein                                                                             |
| COG3741 | P  | ABC-type phosphate/phosphonate transport system, periplasmic component                              |
| COG3881 | R  | Predicted flavin-nucleotide-binding protein, pyridoxine 5'-phosphate oxidase superfamily            |
| COG4262 | T  | Extracellular (periplasmic) sensor domain CHASE1 (specificity unknown)                              |
| COG4294 | P  | ABC-type phosphate/phosphonate transport system, ATPase component                                   |
| COG4372 | P  | ABC-type phosphate/phosphonate transport system, permease component                                 |
| COG4880 | E  | N-formylglutamate amidohydrolase                                                                    |
| COG5002 | R  | Predicted spermidine synthase with an N-terminal membrane domain                                    |
| COG5207 | R  | Secreted protein containing C-terminal beta-propeller domain distantly related to WD-40 repeats     |
| COG5431 | R  | Uncharacterized Zn-finger protein, UBP-type                                                         |
| COG5653 | R  | Predicted nucleic acid-binding protein, contains Zn-finger domain                                   |

---

**Jiulong River estuary AOA vs. *Ca. Nitrosomarinus* (SPOT01)**

---

|         |   |                                                                                     |
|---------|---|-------------------------------------------------------------------------------------|
| COG0312 | T | Serine/threonine protein kinase                                                     |
| COG0405 | D | Chromosome segregation protein Spo0J, contains ParB-like nuclease domain            |
| COG0421 | R | Predicted RNA-binding protein, contains uracil-DNA-glycosylase-like and PUA domains |
| COG0515 | S | Uncharacterized conserved protein YbbK, DUF523 family                               |
| COG0636 | S | Uncharacterized conserved protein, DUF58 family, contains vWF domain                |
| COG0640 | R | Predicted Zn-dependent protease                                                     |
| COG1011 | C | Archaeal/vacuolar-type H <sup>+</sup> -ATPase subunit H                             |
| COG1181 | M | PASTA domain, binds beta-lactams                                                    |
| COG1301 | R | Predicted N-acetyltransferase YhbS                                                  |

---

|         |    |                                                                                                     |
|---------|----|-----------------------------------------------------------------------------------------------------|
| COG1475 | G  | Chitinase, GH18 family                                                                              |
| COG1549 | S  | Uncharacterized protein YrrD, contains PRC-barrel domain                                            |
| COG1605 | L  | UV DNA damage repair endonuclease                                                                   |
| COG1683 | S  | Uncharacterized conserved protein, contains DUF3084 domain                                          |
| COG1721 | T  | Signal transduction histidine kinase                                                                |
| COG1828 | N  | Acetyltransferase involved in cellulose biosynthesis, CelD/BcsL family                              |
| COG1913 | R  | Predicted Zn-dependent protease or its inactivated homolog                                          |
| COG2015 | E  | Gamma-glutamyltranspeptidase                                                                        |
| COG2222 | E  | Spermidine synthase                                                                                 |
| COG2260 | C  | FoF1-type ATP synthase, membrane subunit c/Archaeal/vacuolar-type H <sup>+</sup> -ATPase, subunit K |
| COG2329 | K  | DNA-binding transcriptional regulator, ArsR family                                                  |
| COG2430 | H  | FMN phosphatase YigB, HAD superfamily                                                               |
| COG2811 | MR | D-alanine-D-alanine ligase and related ATP-grasp enzymes                                            |
| COG2815 | C  | Na <sup>+</sup> /H <sup>+</sup> -dicarboxylate symporter                                            |
| COG3153 | E  | Chorismate mutase                                                                                   |
| COG3221 | F  | Phosphoribosylformylglycinamide (FGAM) synthase, PurS component                                     |
| COG3325 | Q  | Alkyl sulfatase BDS1 and related hydrolases, metallo-beta-lactamase superfamily                     |
| COG3576 | M  | Fructoselysine-6-P-deglycase FrlB and related proteins with duplicated sugar isomerase (SIS) domain |
| COG3614 | J  | rRNA maturation protein Nop10, contains Zn-ribbon domain                                            |
| COG3638 | H  | Heme-degrading monooxygenase HmoA and related ABM domain proteins                                   |
| COG3639 | S  | Uncharacterized protein                                                                             |
| COG3741 | P  | ABC-type phosphate/phosphonate transport system, periplasmic component                              |
| COG3881 | R  | Predicted flavin-nucleotide-binding protein, pyridoxine 5'-phosphate oxidase superfamily            |
| COG4262 | T  | Extracellular (periplasmic) sensor domain CHASE1 (specificity unknown)                              |
| COG4294 | P  | ABC-type phosphate/phosphonate transport system, ATPase component                                   |
| COG4372 | P  | ABC-type phosphate/phosphonate transport system, permease component                                 |
| COG4880 | E  | N-formylglutamate amidohydrolase                                                                    |
| COG5002 | R  | Predicted spermidine synthase with an N-terminal membrane domain                                    |
| COG5207 | R  | Secreted protein containing C-terminal beta-propeller domain distantly related to WD-40 repeats     |
| COG5431 | R  | Uncharacterized Zn-finger protein, UBP-type                                                         |
| COG5653 | R  | Predicted nucleic acid-binding protein, contains Zn-finger domain                                   |

**Table S8 Detailed annotations of unique genes encoded in the new AOA species**

| Gene cluster | MAGs   | Contig_id | Annotations                                                                              |
|--------------|--------|-----------|------------------------------------------------------------------------------------------|
| GC_00001152  | S1bin1 | contig_38 | DNA-binding response regulator, OmpR family, contains REC and winged-helix (wHTH) domain |
| GC_00001152  | S1bin1 | contig_35 | DNA-binding response regulator, OmpR family,                                             |

|             |        |                |                                                                                                                                                 |
|-------------|--------|----------------|-------------------------------------------------------------------------------------------------------------------------------------------------|
| GC_00001152 | S2bin1 | contig_19      | contains REC and winged-helix (WHTH) domain<br>DNA-binding response regulator, OmpR family,<br>contains REC and winged-helix (WHTH) domain      |
| GC_00001152 | S3bin1 | contig_65      | DNA-binding response regulator, OmpR family,<br>contains REC and winged-helix (WHTH) domain                                                     |
| GC_00001152 | S3bin1 | contig_481     | DNA-binding response regulator, OmpR family,<br>contains REC and winged-helix (WHTH) domain                                                     |
| GC_00001152 | S3bin1 | contig_21      | DNA-binding response regulator, OmpR family,<br>contains REC and winged-helix (WHTH) domain                                                     |
| GC_00001152 | W1bin1 | scaffold_2754  | DNA-binding response regulator, OmpR family,<br>contains REC and winged-helix (WHTH) domain                                                     |
| GC_00001152 | W1bin1 | scaffold_2754  | DNA-binding response regulator, OmpR family,<br>contains REC and winged-helix (WHTH) domain                                                     |
| GC_00001152 | W1bin1 | scaffold_12641 | DNA-binding response regulator, OmpR family,<br>contains REC and winged-helix (WHTH) domain                                                     |
| GC_00001152 | W2bin3 | contig_408     | DNA-binding response regulator, OmpR family,<br>contains REC and winged-helix (WHTH) domain                                                     |
| GC_00001152 | W2bin3 | contig_64      | DNA-binding response regulator, OmpR family,<br>contains REC and winged-helix (WHTH) domain                                                     |
| GC_00001152 | W2bin3 | contig_2251    | DNA-binding response regulator, OmpR family,<br>contains REC and winged-helix (WHTH) domain                                                     |
| GC_00001152 | W2bin3 | contig_147     | DNA-binding response regulator, OmpR family,<br>contains REC and winged-helix (WHTH) domain                                                     |
| GC_00001438 | S1bin1 | contig_80      | DNA polymerase elongation subunit (family B)                                                                                                    |
| GC_00001438 | S1bin1 | contig_13      | DNA polymerase elongation subunit (family B)                                                                                                    |
| GC_00001438 | S2bin1 | contig_3       | DNA polymerase elongation subunit (family B)                                                                                                    |
| GC_00001438 | S3bin1 | contig_264     | DNA polymerase elongation subunit (family B)                                                                                                    |
| GC_00001438 | S3bin1 | contig_149     | DNA polymerase elongation subunit (family B)                                                                                                    |
| GC_00001438 | W1bin1 | scaffold_35710 | DNA polymerase elongation subunit (family B)                                                                                                    |
| GC_00001438 | W1bin1 | scaffold_35710 | DNA polymerase elongation subunit (family B)                                                                                                    |
| GC_00001438 | W2bin3 | contig_280     | DNA polymerase elongation subunit (family B)                                                                                                    |
| GC_00001438 | W2bin3 | contig_307     | DNA polymerase elongation subunit (family B)                                                                                                    |
| GC_00001589 | S1bin1 | contig_1       | Aryl-phospho-beta-D-glucosidase BglC, GH1<br>family Chitinase, GH18 family SFI04223.1<br>Chitinase, GH18 family [Planctomicrobium<br>piriforme] |
| GC_00001589 | S2bin1 | contig_9       | Aryl-phospho-beta-D-glucosidase BglC, GH1<br>family Chitinase, GH18 family SFI04223.1<br>Chitinase, GH18 family [Planctomicrobium<br>piriforme] |
| GC_00001589 | S3bin1 | contig_259     | Aryl-phospho-beta-D-glucosidase BglC, GH1<br>family Chitinase, GH18 family SFI04223.1<br>Chitinase, GH18 family [Planctomicrobium<br>piriforme] |

|             |        |                |                                                                                                                                        |
|-------------|--------|----------------|----------------------------------------------------------------------------------------------------------------------------------------|
| GC_00001589 | W1bin1 | scaffold_3058  | Aryl-phospho-beta-D-glucosidase BglC, GH1 family Chitinase, GH18 family SFI04223.1 Chitinase, GH18 family [Planctomicrobium piriforme] |
| GC_00001589 | W2bin3 | contig_117     | Aryl-phospho-beta-D-glucosidase BglC, GH1 family Chitinase, GH18 family SFI04223.1 Chitinase, GH18 family [Planctomicrobium piriforme] |
| GC_00001589 | W2bin3 | contig_1984    | Aryl-phospho-beta-D-glucosidase BglC, GH1 family Chitinase, GH18 family SFI04223.1 Chitinase, GH18 family [Planctomicrobium piriforme] |
| GC_00001606 | S1bin1 | contig_1       | Ig (Immunoglobulin) family protein [Thaumarchaeota archaeon CSP1-1]                                                                    |
| GC_00001606 | S2bin1 | contig_31      | Ig (Immunoglobulin) family protein [Thaumarchaeota archaeon CSP1-1]                                                                    |
| GC_00001606 | S3bin1 | contig_41      | Ig (Immunoglobulin) family protein [Thaumarchaeota archaeon CSP1-1]                                                                    |
| GC_00001606 | W1bin1 | scaffold_8857  | Ig (Immunoglobulin) family protein [Thaumarchaeota archaeon CSP1-1]                                                                    |
| GC_00001606 | W2bin3 | contig_1236    | Ig (Immunoglobulin) family protein [Thaumarchaeota archaeon CSP1-1]                                                                    |
| GC_00001606 | W2bin3 | contig_43      | Ig (Immunoglobulin) family protein [Thaumarchaeota archaeon CSP1-1]                                                                    |
| GC_00001621 | S1bin1 | contig_38      | YIP1 family protein [Jeotgalibacillus campisalis]                                                                                      |
| GC_00001621 | S3bin1 | contig_100     | YIP1 family protein [Jeotgalibacillus campisalis]                                                                                      |
| GC_00001621 | S3bin1 | contig_21      | YIP1 family protein [Jeotgalibacillus campisalis]                                                                                      |
| GC_00001621 | W1bin1 | scaffold_29150 | YIP1 family protein [Jeotgalibacillus campisalis]                                                                                      |
| GC_00001621 | W2bin3 | contig_450     | YIP1 family protein [Jeotgalibacillus campisalis]                                                                                      |
| GC_00001621 | W2bin3 | contig_128     | YIP1 family protein [Jeotgalibacillus campisalis]                                                                                      |
| GC_00001627 | S1bin1 | contig_89      | Uncharacterized conserved protein YfaS, alpha-2-macroglobulin family                                                                   |
| GC_00001627 | S2bin1 | contig_88      | Uncharacterized conserved protein YfaS, alpha-2-macroglobulin family                                                                   |
| GC_00001627 | S2bin1 | contig_129     | Uncharacterized conserved protein YfaS, alpha-2-macroglobulin family                                                                   |
| GC_00001627 | S3bin1 | contig_64      | Uncharacterized conserved protein YfaS, alpha-2-macroglobulin family                                                                   |
| GC_00001627 | W1bin1 | scaffold_38255 | Uncharacterized conserved protein YfaS, alpha-2-macroglobulin family                                                                   |
| GC_00001627 | W2bin3 | contig_1821    | Uncharacterized conserved protein YfaS, alpha-2-macroglobulin family                                                                   |
| GC_00001661 | S1bin1 | contig_213     | tetratricopeptide repeat protein [Candidatus Nitrosopelagicus brevis]                                                                  |

|             |        |                |                                                                                                    |
|-------------|--------|----------------|----------------------------------------------------------------------------------------------------|
| GC_00001661 | S2bin1 | contig_73      | tetratricopeptide repeat protein [Candidatus Nitrosopelagicus brevis]                              |
| GC_00001661 | W1bin1 | scaffold_26013 | tetratricopeptide repeat protein [Candidatus Nitrosopelagicus brevis]                              |
| GC_00001661 | W2bin3 | contig_708     | tetratricopeptide repeat protein [Candidatus Nitrosopelagicus brevis]                              |
| GC_00001661 | W2bin3 | contig_653     | tetratricopeptide repeat protein [Candidatus Nitrosopelagicus brevis]                              |
| GC_00001661 | W2bin3 | contig_21      | tetratricopeptide repeat protein [Candidatus Nitrosopelagicus brevis]                              |
| GC_00001677 | S1bin1 | contig_131     | thr operon leader peptide, partial [Nitrosopumilales archaeon CG11_big_fil_rev_8_21_14_0_20_33_24] |
| GC_00001677 | S2bin1 | contig_20      | thr operon leader peptide, partial [Nitrosopumilales archaeon CG11_big_fil_rev_8_21_14_0_20_33_24] |
| GC_00001677 | S3bin1 | contig_593     | thr operon leader peptide, partial [Nitrosopumilales archaeon CG11_big_fil_rev_8_21_14_0_20_33_24] |
| GC_00001677 | W1bin1 | scaffold_17716 | thr operon leader peptide, partial [Nitrosopumilales archaeon CG11_big_fil_rev_8_21_14_0_20_33_24] |
| GC_00001677 | W2bin3 | contig_740     | thr operon leader peptide, partial [Nitrosopumilales archaeon CG11_big_fil_rev_8_21_14_0_20_33_24] |
| GC_00001678 | S1bin1 | contig_18      | polyketide cyclase [Candidatus Nitrosotenuis sp. AQ6f]                                             |
| GC_00001678 | S2bin1 | contig_18      | polyketide cyclase [Candidatus Nitrosotenuis sp. AQ6f]                                             |
| GC_00001678 | S3bin1 | contig_1       | polyketide cyclase [Candidatus Nitrosotenuis sp. AQ6f]                                             |
| GC_00001678 | W1bin1 | scaffold_7106  | polyketide cyclase [Candidatus Nitrosotenuis sp. AQ6f]                                             |
| GC_00001678 | W2bin3 | contig_715     | polyketide cyclase [Candidatus Nitrosotenuis sp. AQ6f]                                             |
| GC_00001680 | S1bin1 | contig_172     | FMN phosphatase YigB, HAD superfamily                                                              |
| GC_00001680 | S2bin1 | contig_98      | FMN phosphatase YigB, HAD superfamily                                                              |
| GC_00001680 | S3bin1 | contig_76      | FMN phosphatase YigB, HAD superfamily                                                              |
| GC_00001680 | W1bin1 | scaffold_86398 | FMN phosphatase YigB, HAD superfamily                                                              |
| GC_00001680 | W2bin3 | contig_1164    | FMN phosphatase YigB, HAD superfamily                                                              |
| GC_00001685 | S1bin1 | contig_1       | Sugar-specific transcriptional regulator TrmB                                                      |
| GC_00001685 | S2bin1 | contig_31      | Sugar-specific transcriptional regulator TrmB                                                      |
| GC_00001685 | S3bin1 | contig_28      | Sugar-specific transcriptional regulator TrmB                                                      |
| GC_00001685 | W1bin1 | scaffold_8857  | Sugar-specific transcriptional regulator TrmB                                                      |

|             |        |                |                                                                                                                    |
|-------------|--------|----------------|--------------------------------------------------------------------------------------------------------------------|
| GC_00001685 | W2bin3 | contig_43      | Sugar-specific transcriptional regulator TrmB                                                                      |
| GC_00001686 | S1bin1 | contig_13      | 2-hydroxy-3-oxopropionate reductase (mmsB)<br>[uncultured marine thaumarchaeote<br>KM3_136_D12]                    |
| GC_00001686 | S2bin1 | contig_3       | 2-hydroxy-3-oxopropionate reductase (mmsB)<br>[uncultured marine thaumarchaeote<br>KM3_136_D12]                    |
| GC_00001686 | S3bin1 | contig_5       | 2-hydroxy-3-oxopropionate reductase (mmsB)<br>[uncultured marine thaumarchaeote<br>KM3_136_D12]                    |
| GC_00001686 | W1bin1 | scaffold_878   | 2-hydroxy-3-oxopropionate reductase (mmsB)<br>[uncultured marine thaumarchaeote<br>KM3_136_D12]                    |
| GC_00001686 | W2bin3 | contig_440     | 2-hydroxy-3-oxopropionate reductase (mmsB)<br>[uncultured marine thaumarchaeote<br>KM3_136_D12]                    |
| GC_00001687 | S1bin1 | contig_187     | zinc ribbon domain-containing protein<br>[Clostridium neonatale]                                                   |
| GC_00001687 | S2bin1 | contig_14      | zinc ribbon domain-containing protein<br>[Clostridium neonatale]                                                   |
| GC_00001687 | S3bin1 | contig_194     | zinc ribbon domain-containing protein<br>[Clostridium neonatale]                                                   |
| GC_00001687 | W1bin1 | scaffold_4666  | zinc ribbon domain-containing protein<br>[Clostridium neonatale]                                                   |
| GC_00001687 | W2bin3 | contig_334     | zinc ribbon domain-containing protein<br>[Clostridium neonatale]                                                   |
| GC_00001689 | S1bin1 | contig_1       | Signal-transduction protein containing<br>cAMP-binding, CBS, and nucleotidyltransferase<br>domains                 |
| GC_00001689 | S2bin1 | contig_27      | Signal-transduction protein containing<br>cAMP-binding, CBS, and nucleotidyltransferase<br>domains                 |
| GC_00001689 | S3bin1 | contig_23      | Signal-transduction protein containing<br>cAMP-binding, CBS, and nucleotidyltransferase<br>domains                 |
| GC_00001689 | W1bin1 | scaffold_12156 | Signal-transduction protein containing<br>cAMP-binding, CBS, and nucleotidyltransferase<br>domains                 |
| GC_00001689 | W2bin3 | contig_223     | Signal-transduction protein containing<br>cAMP-binding, CBS, and nucleotidyltransferase<br>domains                 |
| GC_00001692 | S1bin1 | contig_117     | Uncharacterized conserved protein YbbK,<br>DUF523 family Uncharacterized conserved<br>protein YbgA, DUF1722 family |

|             |        |                          |                                                                                                              |
|-------------|--------|--------------------------|--------------------------------------------------------------------------------------------------------------|
| GC_00001692 | S2bin1 | contig_31                | Uncharacterized conserved protein YbbK, DUF523 family Uncharacterized conserved protein YbgA, DUF1722 family |
| GC_00001692 | S3bin1 | contig_28                | Uncharacterized conserved protein YbbK, DUF523 family Uncharacterized conserved protein YbgA, DUF1722 family |
| GC_00001692 | W1bin1 | scaffold_24263           | Uncharacterized conserved protein YbbK, DUF523 family Uncharacterized conserved protein YbgA, DUF1722 family |
| GC_00001692 | W2bin3 | contig_43                | Uncharacterized conserved protein YbbK, DUF523 family Uncharacterized conserved protein YbgA, DUF1722 family |
| GC_00001714 | S1bin1 | contig_3_partial_0_26617 | Archaeum biogenesis protein FlaJ, TadC family                                                                |
| GC_00001714 | S2bin1 | contig_59                | Archaeum biogenesis protein FlaJ, TadC family                                                                |
| GC_00001714 | W1bin1 | scaffold_13376           | Archaeum biogenesis protein FlaJ, TadC family                                                                |
| GC_00001714 | W1bin1 | scaffold_147792          | Archaeum biogenesis protein FlaJ, TadC family                                                                |
| GC_00001714 | W2bin3 | contig_723               | Archaeum biogenesis protein FlaJ, TadC family                                                                |
| GC_00001716 | S1bin1 | contig_13                | Rad51 [Candidatus Nitrososphaera evergladensis SR1]                                                          |
| GC_00001716 | S2bin1 | contig_3                 | Rad51 [Candidatus Nitrososphaera evergladensis SR1]                                                          |
| GC_00001716 | W1bin1 | scaffold_878             | Rad51 [Candidatus Nitrososphaera evergladensis SR1]                                                          |
| GC_00001716 | W2bin3 | contig_280               | Rad51 [Candidatus Nitrososphaera evergladensis SR1]                                                          |
| GC_00001716 | S3bin1 | contig_264               | Rad51 [Candidatus Nitrososphaera evergladensis SR1]                                                          |
| GC_00001718 | S1bin1 | contig_1                 | K <sup>+</sup> -sensing histidine kinase KdpD                                                                |
| GC_00001718 | S2bin1 | contig_6                 | K <sup>+</sup> -sensing histidine kinase KdpD                                                                |
| GC_00001718 | S3bin1 | contig_38                | K <sup>+</sup> -sensing histidine kinase KdpD                                                                |
| GC_00001718 | W1bin1 | scaffold_12156           | K <sup>+</sup> -sensing histidine kinase KdpD                                                                |
| GC_00001718 | W2bin3 | contig_175               | K <sup>+</sup> -sensing histidine kinase KdpD                                                                |
| GC_00001719 | S1bin1 | contig_204               | DNA repair exonuclease SbcCD ATPase subunit                                                                  |
| GC_00001719 | S2bin1 | contig_56                | DNA repair exonuclease SbcCD ATPase subunit                                                                  |
| GC_00001719 | S3bin1 | contig_193               | DNA repair exonuclease SbcCD ATPase subunit                                                                  |
| GC_00001719 | W1bin1 | scaffold_21308           | DNA repair exonuclease SbcCD ATPase subunit                                                                  |
| GC_00001719 | W2bin3 | contig_449               | DNA repair exonuclease SbcCD ATPase subunit                                                                  |
| GC_00001722 | S1bin1 | contig_40                | Small nuclear ribonucleoprotein (snRNP) homolog                                                              |
| GC_00001722 | S1bin1 | contig_130               | Small nuclear ribonucleoprotein (snRNP) homolog                                                              |
| GC_00001722 | S2bin1 | contig_96                | Small nuclear ribonucleoprotein (snRNP) homolog                                                              |



|             |        |                 |                                                                  |
|-------------|--------|-----------------|------------------------------------------------------------------|
| GC_00001722 | S3bin1 | contig_276      | Small nuclear ribonucleoprotein (snRNP) homolog                  |
| GC_00001722 | W1bin1 | scaffold_127581 | Small nuclear ribonucleoprotein (snRNP) homolog                  |
| GC_00001727 | S1bin1 | contig_18       | Uncharacterized conserved protein YbgA, DUF1722 family           |
| GC_00001727 | S2bin1 | contig_18       | Uncharacterized conserved protein YbgA, DUF1722 family           |
| GC_00001727 | S3bin1 | contig_1        | Uncharacterized conserved protein YbgA, DUF1722 family           |
| GC_00001727 | W1bin1 | scaffold_3608   | Uncharacterized conserved protein YbgA, DUF1722 family           |
| GC_00001727 | W2bin3 | contig_185      | Uncharacterized conserved protein YbgA, DUF1722 family           |
| GC_00001773 | S1bin1 | contig_40       | Ubiquinone/menaquinone C-methylase UbiE biosynthesis             |
| GC_00001773 | S1bin1 | contig_130      | Ubiquinone/menaquinone C-methylase UbiE biosynthesis             |
| GC_00001773 | S2bin1 | contig_96       | Ubiquinone/menaquinone C-methylase UbiE biosynthesis             |
| GC_00001773 | S3bin1 | contig_276      | Ubiquinone/menaquinone C-methylase UbiE biosynthesis             |
| GC_00001773 | W1bin1 | scaffold_127581 | Ubiquinone/menaquinone C-methylase UbiE biosynthesis             |
| GC_00001820 | S1bin1 | contig_1        | histidine kinase [Marine Group I thaumarchaeote SCGC AAA799-P11] |
| GC_00001820 | S2bin1 | contig_31       | histidine kinase [Marine Group I thaumarchaeote SCGC AAA799-P11] |
| GC_00001820 | S3bin1 | contig_28       | histidine kinase [Marine Group I thaumarchaeote SCGC AAA799-P11] |
| GC_00001820 | W2bin3 | contig_43       | histidine kinase [Marine Group I thaumarchaeote SCGC AAA799-P11] |
| GC_00001821 | S1bin1 | contig_18       | Multimeric flavodoxin WrbA                                       |
| GC_00001821 | S2bin1 | contig_18       | Multimeric flavodoxin WrbA                                       |
| GC_00001821 | S3bin1 | contig_1        | Multimeric flavodoxin WrbA                                       |
| GC_00001821 | W1bin1 | scaffold_7106   | Multimeric flavodoxin WrbA                                       |
| GC_00001823 | S1bin1 | contig_136      | Ubiquinone/menaquinone C-methylase UbiE biosynthesis             |
| GC_00001823 | S2bin1 | contig_61       | Ubiquinone/menaquinone C-methylase UbiE biosynthesis             |
| GC_00001823 | W1bin1 | scaffold_38193  | Ubiquinone/menaquinone C-methylase UbiE biosynthesis             |
| GC_00001823 | W2bin3 | contig_316      | Ubiquinone/menaquinone C-methylase UbiE biosynthesis             |

|             |        |               |                                                                                                                                                                                                                                      |
|-------------|--------|---------------|--------------------------------------------------------------------------------------------------------------------------------------------------------------------------------------------------------------------------------------|
| GC_00001849 | W1bin1 | scaffold_9271 | Chemotaxis response regulator CheB, contains REC and protein-glutamate methyltransferase domains                                                                                                                                     |
| GC_00001849 | S1bin1 | contig_21     | DNA-binding response regulator, NarL/FixJ family, contains REC and HTH domains                                                                                                                                                       |
| GC_00001849 | S2bin1 | contig_86     | DNA-binding response regulator, NarL/FixJ family, contains REC and HTH domains                                                                                                                                                       |
| GC_00001849 | S3bin1 | contig_3      | DNA-binding response regulator, NarL/FixJ family, contains REC and HTH domains                                                                                                                                                       |
| GC_00001863 | S1bin1 | contig_78     | Phosphoglycolate phosphatase, HAD superfamily                                                                                                                                                                                        |
| GC_00001863 | S2bin1 | contig_34     | Phosphoglycolate phosphatase, HAD superfamily                                                                                                                                                                                        |
| GC_00001863 | W1bin1 | scaffold_7654 | Phosphoglycolate phosphatase, HAD superfamily                                                                                                                                                                                        |
| GC_00001863 | W2bin3 | contig_731    | Phosphoglycolate phosphatase, HAD superfamily                                                                                                                                                                                        |
| GC_00001867 | S1bin1 | contig_35     | CheY chemotaxis protein or a CheY-like REC (receiver) domain CheY chemotaxis protein or a CheY-like REC (receiver) domain HPt (histidine-containing phosphotransfer) domain PAS domain K <sup>+</sup> -sensing histidine kinase KdpD |
| GC_00001867 | S2bin1 | contig_19     | CheY chemotaxis protein or a CheY-like REC (receiver) domain CheY chemotaxis protein or a CheY-like REC (receiver) domain HPt (histidine-containing phosphotransfer) domain PAS domain K <sup>+</sup> -sensing histidine kinase KdpD |
| GC_00001867 | W1bin1 | scaffold_2754 | CheY chemotaxis protein or a CheY-like REC (receiver) domain CheY chemotaxis protein or a CheY-like REC (receiver) domain HPt (histidine-containing phosphotransfer) domain PAS domain K <sup>+</sup> -sensing histidine kinase KdpD |
| GC_00001867 | W2bin3 | contig_408    | CheY chemotaxis protein or a CheY-like REC (receiver) domain CheY chemotaxis protein or a CheY-like REC (receiver) domain HPt (histidine-containing phosphotransfer) domain PAS domain K <sup>+</sup> -sensing histidine kinase KdpD |
| GC_00001874 | S1bin1 | contig_255    | DNA-binding beta-propeller fold protein YncE DNA-binding beta-propeller fold protein YncE                                                                                                                                            |
| GC_00001874 | S2bin1 | contig_110    | DNA-binding beta-propeller fold protein YncE DNA-binding beta-propeller fold protein YncE                                                                                                                                            |
| GC_00001874 | S3bin1 | contig_93     | DNA-binding beta-propeller fold protein                                                                                                                                                                                              |

|             |        |                          |                                                                                                                                                                                                      |
|-------------|--------|--------------------------|------------------------------------------------------------------------------------------------------------------------------------------------------------------------------------------------------|
|             |        |                          | YncE DNA-binding beta-propeller fold protein YncE                                                                                                                                                    |
| GC_00001874 | W1bin1 | scaffold_2754            | DNA-binding beta-propeller fold protein YncE DNA-binding beta-propeller fold protein YncE                                                                                                            |
| GC_00001880 | S1bin1 | contig_3_partial_0_26617 | Sugar-specific transcriptional regulator TrmB                                                                                                                                                        |
| GC_00001880 | S2bin1 | contig_59                | Sugar-specific transcriptional regulator TrmB                                                                                                                                                        |
| GC_00001880 | W1bin1 | scaffold_13376           | Sugar-specific transcriptional regulator TrmB                                                                                                                                                        |
| GC_00001880 | W2bin3 | contig_978               | Sugar-specific transcriptional regulator TrmB                                                                                                                                                        |
| GC_00001881 | S1bin1 | contig_38                | Uncharacterized conserved protein YeaO, DUF488 family                                                                                                                                                |
| GC_00001881 | S3bin1 | contig_21                | Uncharacterized conserved protein YeaO, DUF488 family                                                                                                                                                |
| GC_00001881 | W1bin1 | scaffold_29150           | Uncharacterized conserved protein YeaO, DUF488 family                                                                                                                                                |
| GC_00001881 | W2bin3 | contig_128               | Uncharacterized conserved protein YeaO, DUF488 family                                                                                                                                                |
| GC_00001900 | S1bin1 | contig_18                | UV DNA damage repair endonuclease                                                                                                                                                                    |
| GC_00001900 | S2bin1 | contig_18                | UV DNA damage repair endonuclease                                                                                                                                                                    |
| GC_00001900 | S3bin1 | contig_1                 | UV DNA damage repair endonuclease                                                                                                                                                                    |
| GC_00001900 | W1bin1 | scaffold_7106            | UV DNA damage repair endonuclease                                                                                                                                                                    |
| GC_00001902 | S1bin1 | contig_26                | Peptidoglycan/xylan/chitin deacetylase, PgdA/CDA1 family                                                                                                                                             |
| GC_00001902 | S2bin1 | contig_78                | Peptidoglycan/xylan/chitin deacetylase, PgdA/CDA1 family                                                                                                                                             |
| GC_00001902 | W1bin1 | scaffold_84949           | Peptidoglycan/xylan/chitin deacetylase, PgdA/CDA1 family                                                                                                                                             |
| GC_00001902 | W2bin3 | contig_177               | Peptidoglycan/xylan/chitin deacetylase, PgdA/CDA1 family                                                                                                                                             |
| GC_00002005 | S1bin1 | contig_79                | Endonuclease YncB, thermonuclease family                                                                                                                                                             |
| GC_00002005 | S3bin1 | contig_217               | Endonuclease YncB, thermonuclease family                                                                                                                                                             |
| GC_00002005 | W1bin1 | scaffold_54873           | Endonuclease YncB, thermonuclease family                                                                                                                                                             |
| GC_00002009 | S1bin1 | contig_113               | K <sup>+</sup> -sensing histidine kinase KdpD                                                                                                                                                        |
| GC_00002009 | S2bin1 | contig_44                | K <sup>+</sup> -sensing histidine kinase KdpD                                                                                                                                                        |
| GC_00002009 | W1bin1 | scaffold_60906           | K <sup>+</sup> -sensing histidine kinase KdpD                                                                                                                                                        |
| GC_00002014 | S2bin1 | contig_53                | Predicted Zn-dependent protease                                                                                                                                                                      |
| GC_00002014 | W1bin1 | scaffold_26013           | Predicted Zn-dependent protease                                                                                                                                                                      |
| GC_00002014 | W2bin3 | contig_107               | Predicted Zn-dependent protease                                                                                                                                                                      |
| GC_00002018 | S2bin1 | contig_79                | PAS domain PAS domain Signal transduction histidine kinase regulating C4-dicarboxylate transport system Signal transduction histidine kinase involved in nitrogen fixation and metabolism regulation |

|             |        |                |                                                                                                                                                                                                      |
|-------------|--------|----------------|------------------------------------------------------------------------------------------------------------------------------------------------------------------------------------------------------|
| GC_00002018 | W1bin1 | scaffold_3608  | PAS domain PAS domain Signal transduction histidine kinase regulating C4-dicarboxylate transport system Signal transduction histidine kinase involved in nitrogen fixation and metabolism regulation |
| GC_00002018 | W2bin3 | contig_829     | PAS domain PAS domain Signal transduction histidine kinase regulating C4-dicarboxylate transport system Signal transduction histidine kinase involved in nitrogen fixation and metabolism regulation |
| GC_00002027 | S1bin1 | contig_51      | Small nuclear ribonucleoprotein (snRNP) homolog                                                                                                                                                      |
| GC_00002027 | S2bin1 | contig_32      | Small nuclear ribonucleoprotein (snRNP) homolog                                                                                                                                                      |
| GC_00002027 | W2bin3 | contig_814     | Small nuclear ribonucleoprotein (snRNP) homolog                                                                                                                                                      |
| GC_00002032 | S1bin1 | contig_40      | Small-conductance mechanosensitive channel                                                                                                                                                           |
| GC_00002032 | S2bin1 | contig_61      | Small-conductance mechanosensitive channel                                                                                                                                                           |
| GC_00002032 | W1bin1 | scaffold_38193 | Small-conductance mechanosensitive channel                                                                                                                                                           |
| GC_00002048 | S2bin1 | contig_199     | signal recognition particle-docking protein FtsY [Candidatus Nitrosoarchaeum sp.]                                                                                                                    |
| GC_00002048 | W1bin1 | scaffold_24263 | signal recognition particle-docking protein FtsY [Candidatus Nitrosoarchaeum sp.]                                                                                                                    |
| GC_00002048 | S1bin1 | contig_494     | signal recognition particle-docking protein FtsY [Candidatus Nitrosopumilus adriaticus]                                                                                                              |
| GC_00002083 | S2bin1 | contig_111     | beta-lactamase domain protein [Nitrosopumilus maritimus SCM1]                                                                                                                                        |
| GC_00002083 | S1bin1 | contig_211     | Glyoxylase or a related metal-dependent hydrolase, beta-lactamase superfamily II                                                                                                                     |
| GC_00002083 | W2bin3 | contig_213     | Glyoxylase or a related metal-dependent hydrolase, beta-lactamase superfamily II                                                                                                                     |
| GC_00002088 | S1bin1 | contig_30      | Predicted dehydrogenase                                                                                                                                                                              |
| GC_00002088 | S2bin1 | contig_67      | Predicted dehydrogenase                                                                                                                                                                              |
| GC_00002088 | W1bin1 | scaffold_8859  | Predicted dehydrogenase                                                                                                                                                                              |
| GC_00002093 | S2bin1 | contig_44      | Secreted protein containing bacterial Ig-like domain and vWFA domain                                                                                                                                 |
| GC_00002093 | W1bin1 | scaffold_60906 | Secreted protein containing bacterial Ig-like domain and vWFA domain                                                                                                                                 |
| GC_00002093 | W2bin3 | contig_970     | Secreted protein containing bacterial Ig-like domain and vWFA domain                                                                                                                                 |
| GC_00002102 | S2bin1 | contig_53      | Arylsulfatase A or related enzyme                                                                                                                                                                    |
| GC_00002102 | W1bin1 | scaffold_13204 | Arylsulfatase A or related enzyme                                                                                                                                                                    |
| GC_00002102 | W1bin1 | scaffold_26013 | Arylsulfatase A or related enzyme                                                                                                                                                                    |
| GC_00002143 | S1bin1 | contig_207     | Uncharacterized conserved protein YfaS,                                                                                                                                                              |

|             |        |                |                                                                                                         |
|-------------|--------|----------------|---------------------------------------------------------------------------------------------------------|
| GC_00002143 | S2bin1 | contig_91      | alpha-2-macroglobulin family<br>Uncharacterized conserved protein YfaS,<br>alpha-2-macroglobulin family |
| GC_00002143 | S3bin1 | contig_148     | Uncharacterized conserved protein YfaS,<br>alpha-2-macroglobulin family                                 |
| GC_00002164 | W2bin3 | contig_21      | hypothetical protein NMY3_00230 [Candidatus<br>Nitrocosmicus oleophilus]                                |
| GC_00002164 | S2bin1 | contig_73      | MEDS: MEthanogen/methylotroph, DcmR<br>Sensory domain [Candidatus Nitrososphaera<br>evergladensis SR1]  |
| GC_00002164 | W1bin1 | scaffold_7346  | MEDS: MEthanogen/methylotroph, DcmR<br>Sensory domain [Candidatus Nitrososphaera<br>evergladensis SR1]  |
| GC_00002448 | S2bin1 | contig_105     | carboxypeptidase regulatory-like<br>domain-containing protein [Candidatus<br>Nitrosoarchaeum koreensis] |
| GC_00002448 | W1bin1 | scaffold_3608  | carboxypeptidase regulatory-like<br>domain-containing protein [Candidatus<br>Nitrosoarchaeum koreensis] |
| GC_00002610 | S2bin1 | contig_53      | Phosphoserine phosphatase                                                                               |
| GC_00002610 | W1bin1 | scaffold_26013 | Phosphoserine phosphatase                                                                               |
| GC_00002654 | S1bin1 | contig_219     | Methyl-accepting chemotaxis protein                                                                     |
| GC_00002654 | S2bin1 | contig_137     | Methyl-accepting chemotaxis protein                                                                     |

## Supplementary Figures

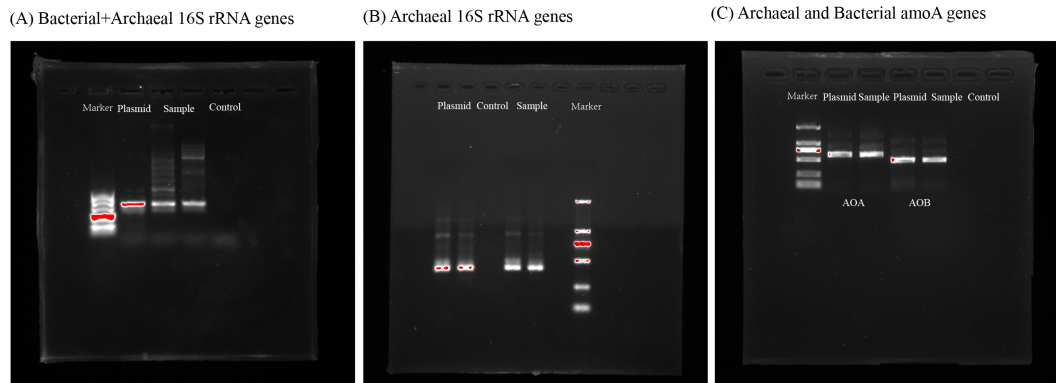

**Figure S1** Gel electrophoretograms for all primer pairs used in the qPCR experiments, including Uni515F-Uni806R (A), Arch519F-Arch808R (B), amoA1F-amoA2R (AOB) and crenamoA23f-crenamoA616r (AOA) (C).

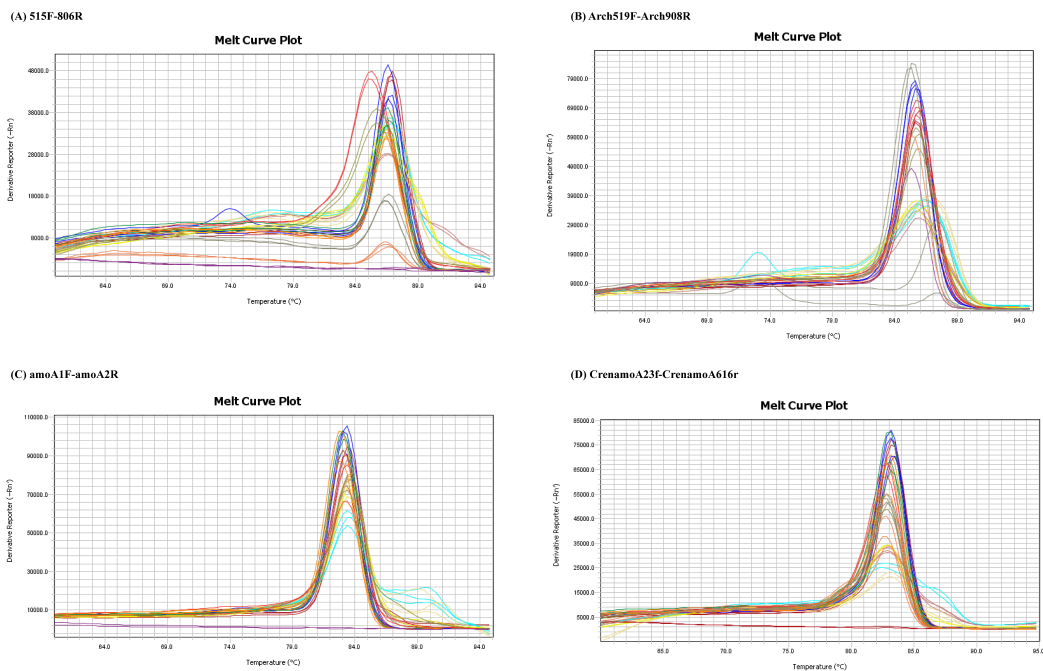

**Figure S2** Melt curve plots for all qPCR experiments conducted in this study, including total 16S rRNA genes (A), archaeal 16S rRNA genes (B), bacterial *amoA* genes (C) and archaeal *amoA* genes (D).

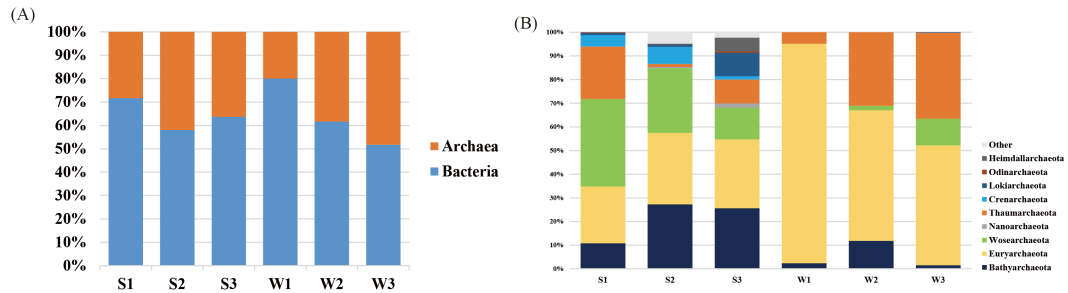

**Figure S3** Prokaryotes community composition (A) and detailed archaeal community composition (B) of samples based on metagenomics. All bacterial and archaeal 16S rRNA genes were extracted from assembled data, and then normalized to calculate the relative abundance. Referring the method part for details.

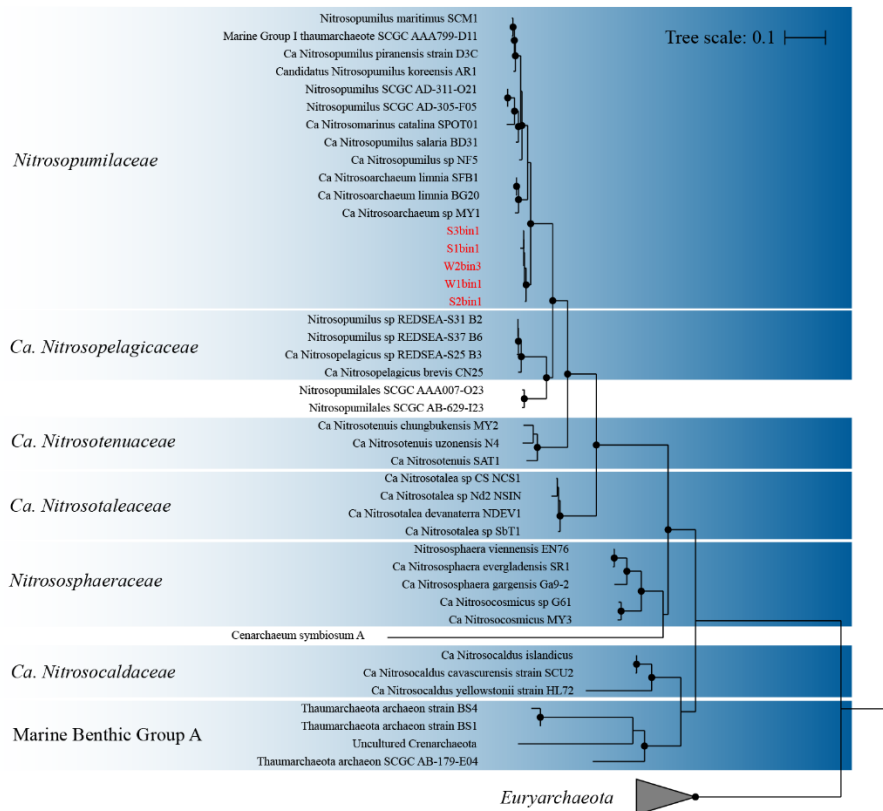

**Figure S4** The phylogenetic tree of concatenated 16S-23S rRNA genes.

Euryarchaeotal genes were set as the outer group, using GTR+F+R6 model with 8489 aliened base sequences. The new AOA species in this study was in red. Bootstraps values > 90 are illustrated by solid circles.

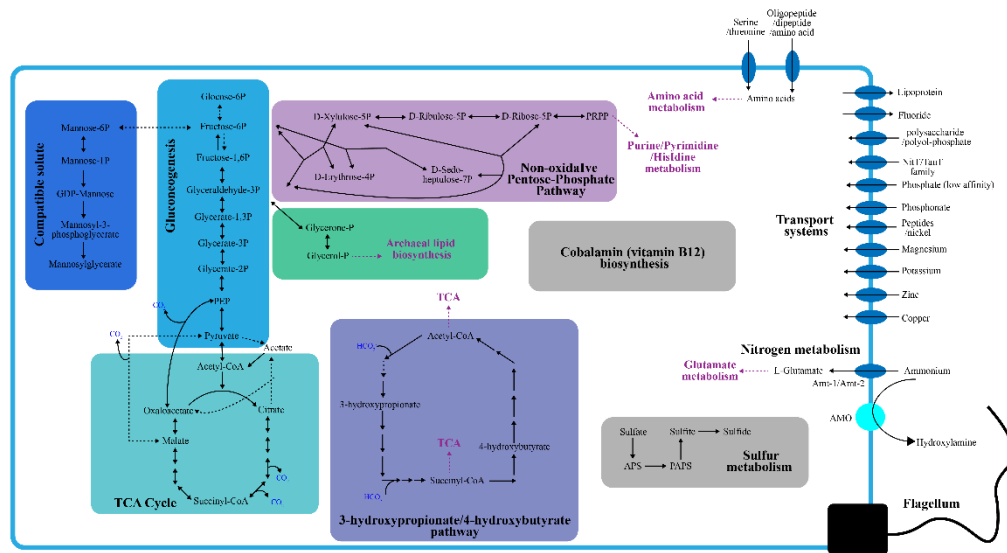

**Figure S5** Major metabolic pathways in the new AOA species in this study. Dashed lines indicate the gene was absent.



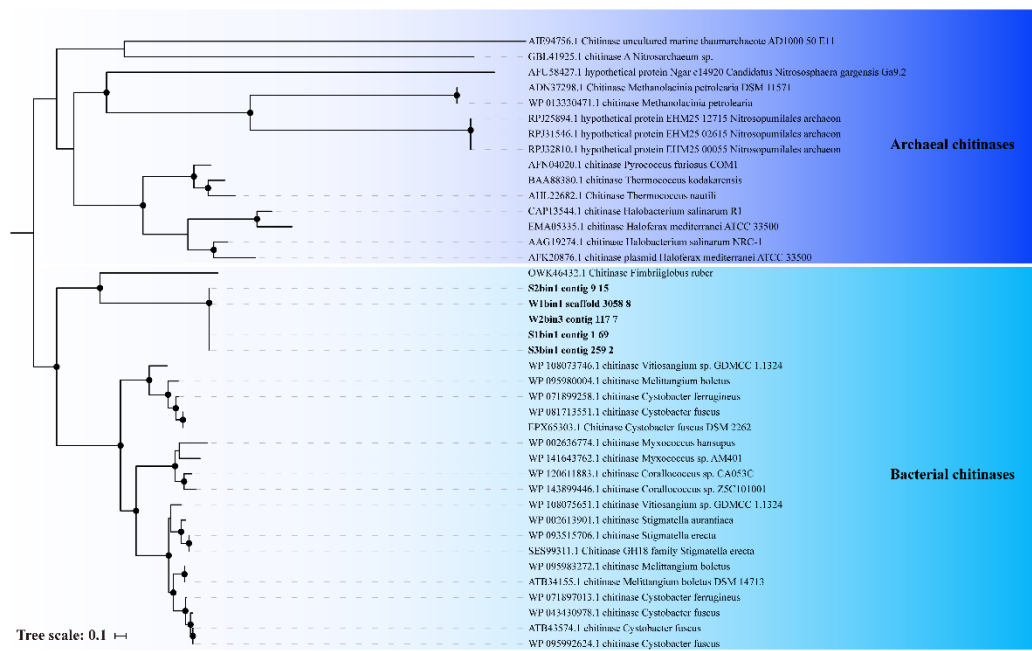

**Figure S6** The phylogenetic tree of chitinases extracted from MAGs in this study (in black bold) and other references sequences (WAG+F+G4 as best model with 2055 aligned amino acid residues). Bootstraps values > 90 are illustrated by solid circles.

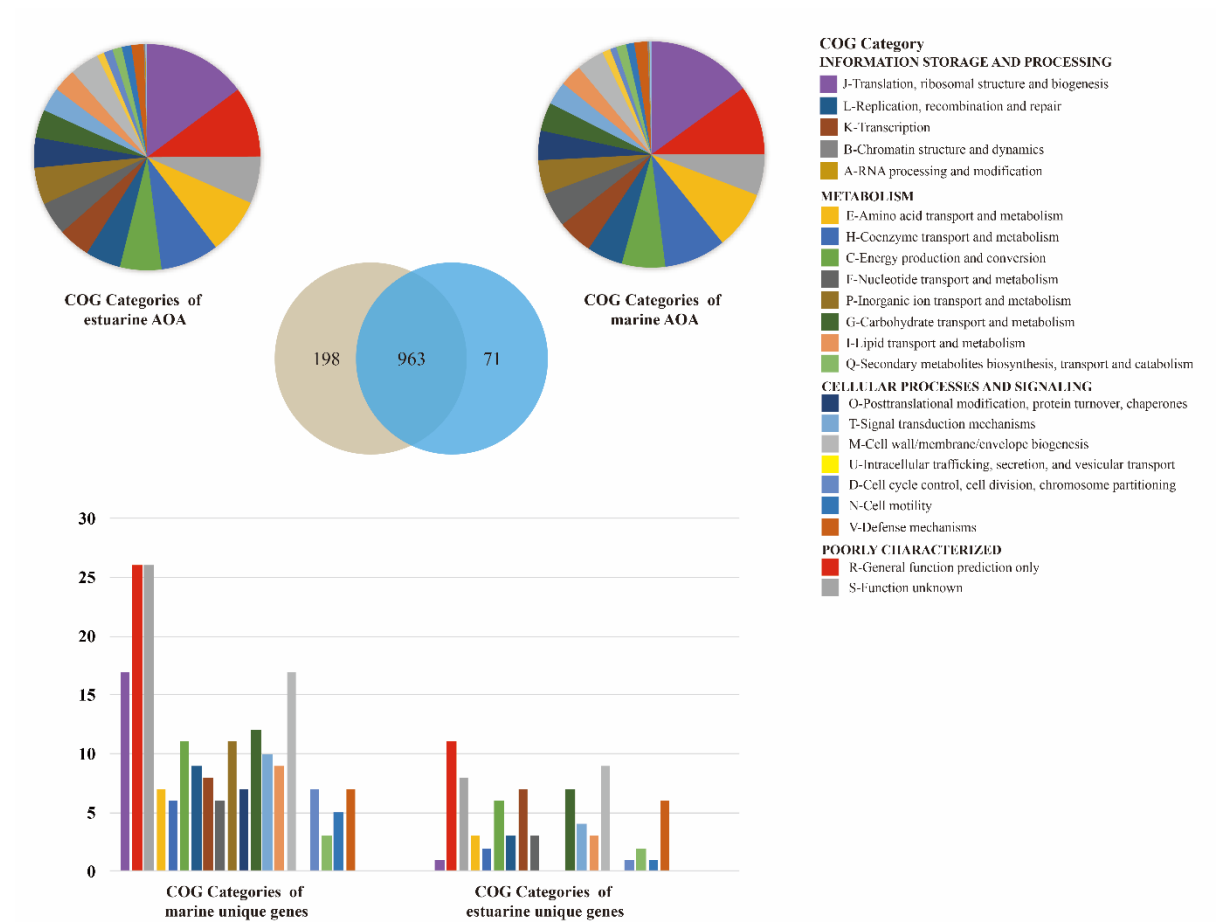

**Figure S7** The comparison about COG function categories between estuarine and marine AOA (detailed definition see method part). Pie charts indicate the function composition, veen chart indicates unique and common gene categories, and bar charts indicate the detailed number of unique genes.

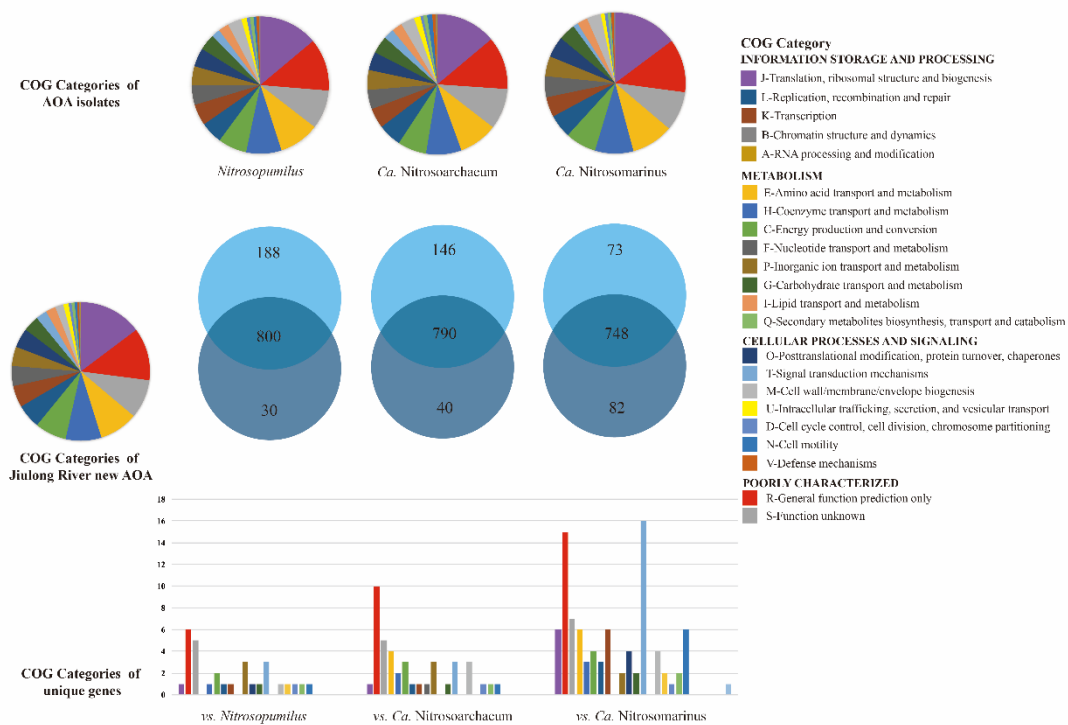

**Figure S8** COG function categories comparison between the new AOA species in this study and other AOA species in family *Nitrosopumilaceae*. Pie charts indicate the function composition, Venn charts indicate unique and common gene categories, and bar charts indicate the detailed number of unique genes.

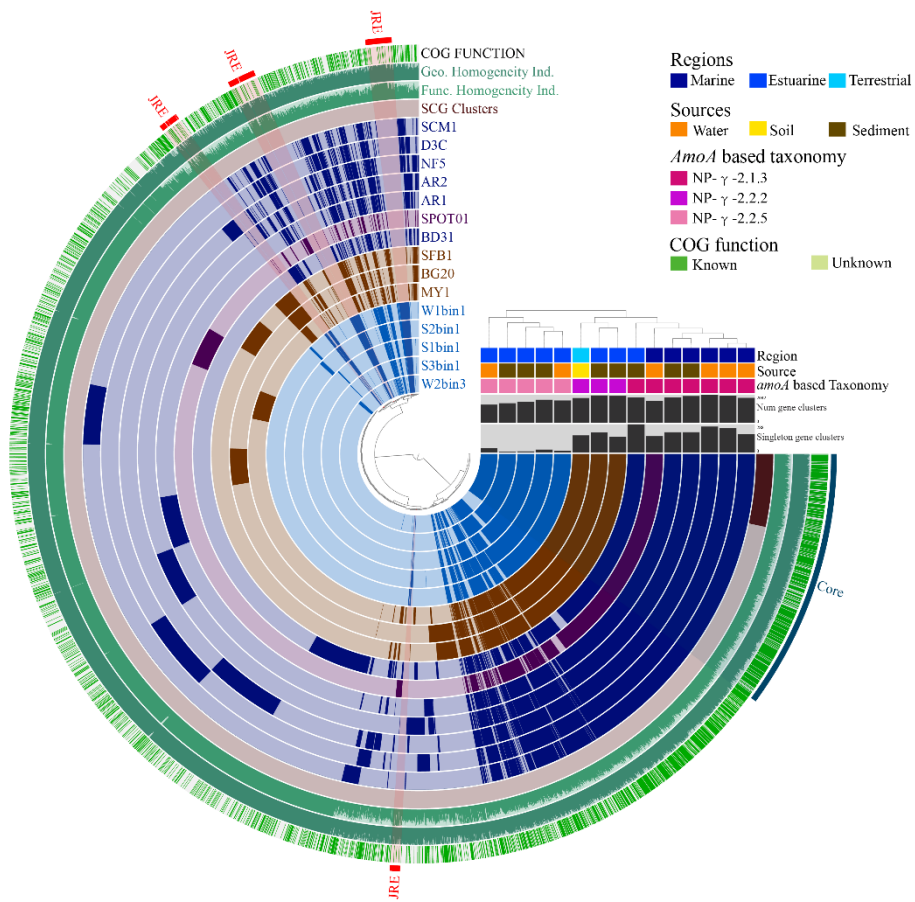

**Figure S9** The pan-genomic analysis of AOA MAGs in this study (in light blue) and other AOA strains in the family *Nitrosopumilaceae*. The red bars (JRE) stands for genes only encoded in this study, and the dark green bar (Core) stands for genes shared by all genomes in this analysis. The isolation regions and sources, as well as the *amoA* genotypes, are presented by color of squares.
